# Supplementary material for: A bimetallic Co4Mo8 cluster built from Mo8 oxothiomolybdate capped by a Co4-thiacalix[4]arene unit: the observation of the Co–Mo synergistic effect for binder-free electrocatalysts
Source: Royal Society of Chemistry journal article supplement (doi:10.1039/c9ta01603a), 2019-01-01
Supplement: c9ta01603a1.pdf [file c9ta01603a1.pdf]

## Electronic Supplementary Information

### Bimetallic $\text{Co}_4\text{Mo}_8$ Cluster Built from $\text{Mo}_8$ Oxothiomolybdate Capped by $\text{Co}_4$ -Thiacalix[4]arene Unit: the Observation of Co-Mo Synergistic Effect for Binder-free Electrocatalyst

Min Zhang,<sup>‡a</sup> Mengwei Chen,<sup>‡a</sup> Yanfeng Bi,<sup>\*a</sup> Liangliang Huang,<sup>a</sup> Kun Zhou,<sup>a</sup> and Zhiping Zheng<sup>\*b</sup>

<sup>a</sup>College of Chemistry, Chemical Engineering and Environmental Engineering, Liaoning Shihua University,  
Fushun 113001, P. R. China. [biyanfeng@lnpu.edu.cn](mailto:biyanfeng@lnpu.edu.cn)

<sup>b</sup>Shenzhen Grubbs Institute and Department of Chemistry, Southern University of Science and Technology,  
Shenzhen, Guangdong 518000, China. E-mail: [zhengzp@sustc.edu.cn](mailto:zhengzp@sustc.edu.cn)

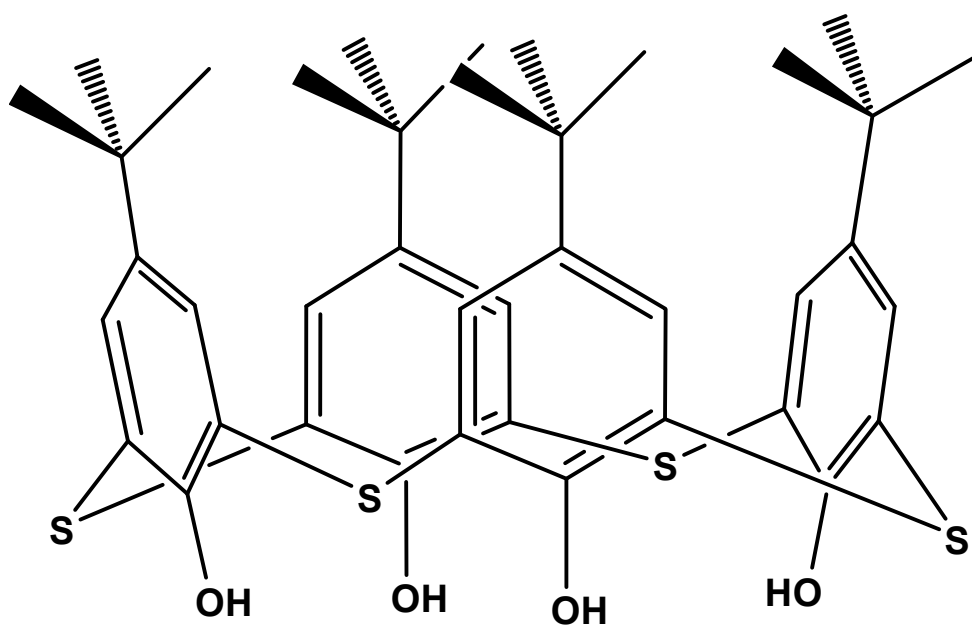

Scheme S1 *p*-tert-Butylthiacalix[4]arene( $\text{H}_4\text{TC4A}$ )

### Note for single crystal X-ray diffraction.

# SQUEEZE RESULTS (APPEND TO CIF)

# Note: Data are Listed for all Voids in the P1 Unit Cell

# i.e. Centre of Gravity, Solvent Accessible Volume,

# Recovered number of Electrons in the Void and

# Details about the Squeezed Material

loop\_

\_platon\_squeeze\_void\_nr

\_platon\_squeeze\_void\_average\_x

\_platon\_squeeze\_void\_average\_y

\_platon\_squeeze\_void\_average\_z

\_platon\_squeeze\_void\_volume

\_platon\_squeeze\_void\_count\_electrons

\_platon\_squeeze\_void\_content

|    |       |       |        |     |       |
|----|-------|-------|--------|-----|-------|
| 1  | 0.249 | 0.248 | 0.504  | 212 | 43 '' |
| 2  | 0.250 | 0.749 | -0.004 | 212 | 46 '' |
| 3  | 0.059 | 0.649 | 0.320  | 9   | 2 ''  |
| 4  | 0.163 | 0.254 | 0.805  | 18  | 3 ''  |
| 5  | 0.336 | 0.754 | 0.695  | 18  | 2 ''  |
| 6  | 0.440 | 0.149 | 0.179  | 9   | 2 ''  |
| 7  | 0.749 | 0.251 | 1.004  | 212 | 42 '' |
| 8  | 0.751 | 0.751 | 0.496  | 212 | 45 '' |
| 9  | 0.559 | 0.851 | 0.820  | 9   | 3 ''  |
| 10 | 0.663 | 0.246 | 0.305  | 18  | 3 ''  |
| 11 | 0.836 | 0.746 | 0.195  | 18  | 3 ''  |
| 12 | 0.940 | 0.351 | 0.679  | 9   | 2 ''  |

\_platon\_squeeze\_details

?

SQUEEZE gives four main electron regions per unit cell for **Co<sub>4</sub>Mo<sub>8</sub>**, which can be assigned to the contributions of four unsolved CHCl<sub>3</sub> in the voids. As there are four formula unit per cell, the TENTATIVE formula for the compounds might be:

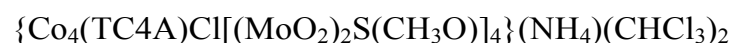

The precession images 0kl (left) and h0l (right) layers of **Co<sub>4</sub>Mo<sub>8</sub>** are presented

below:

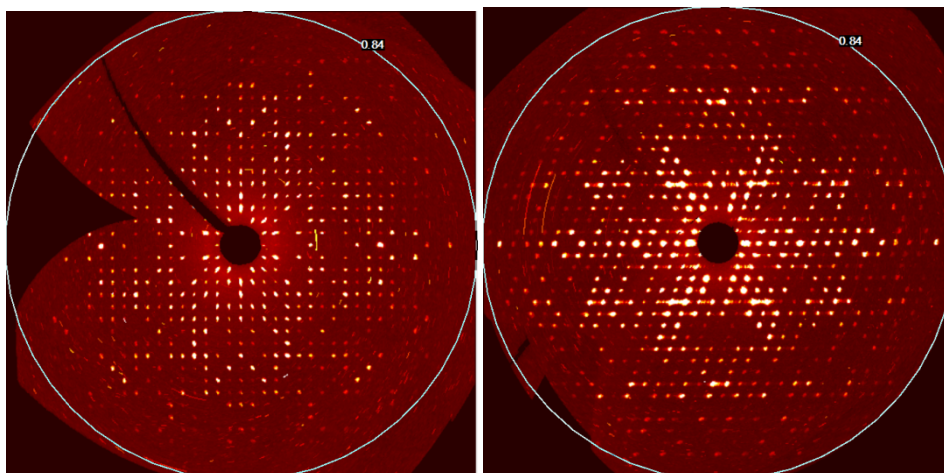

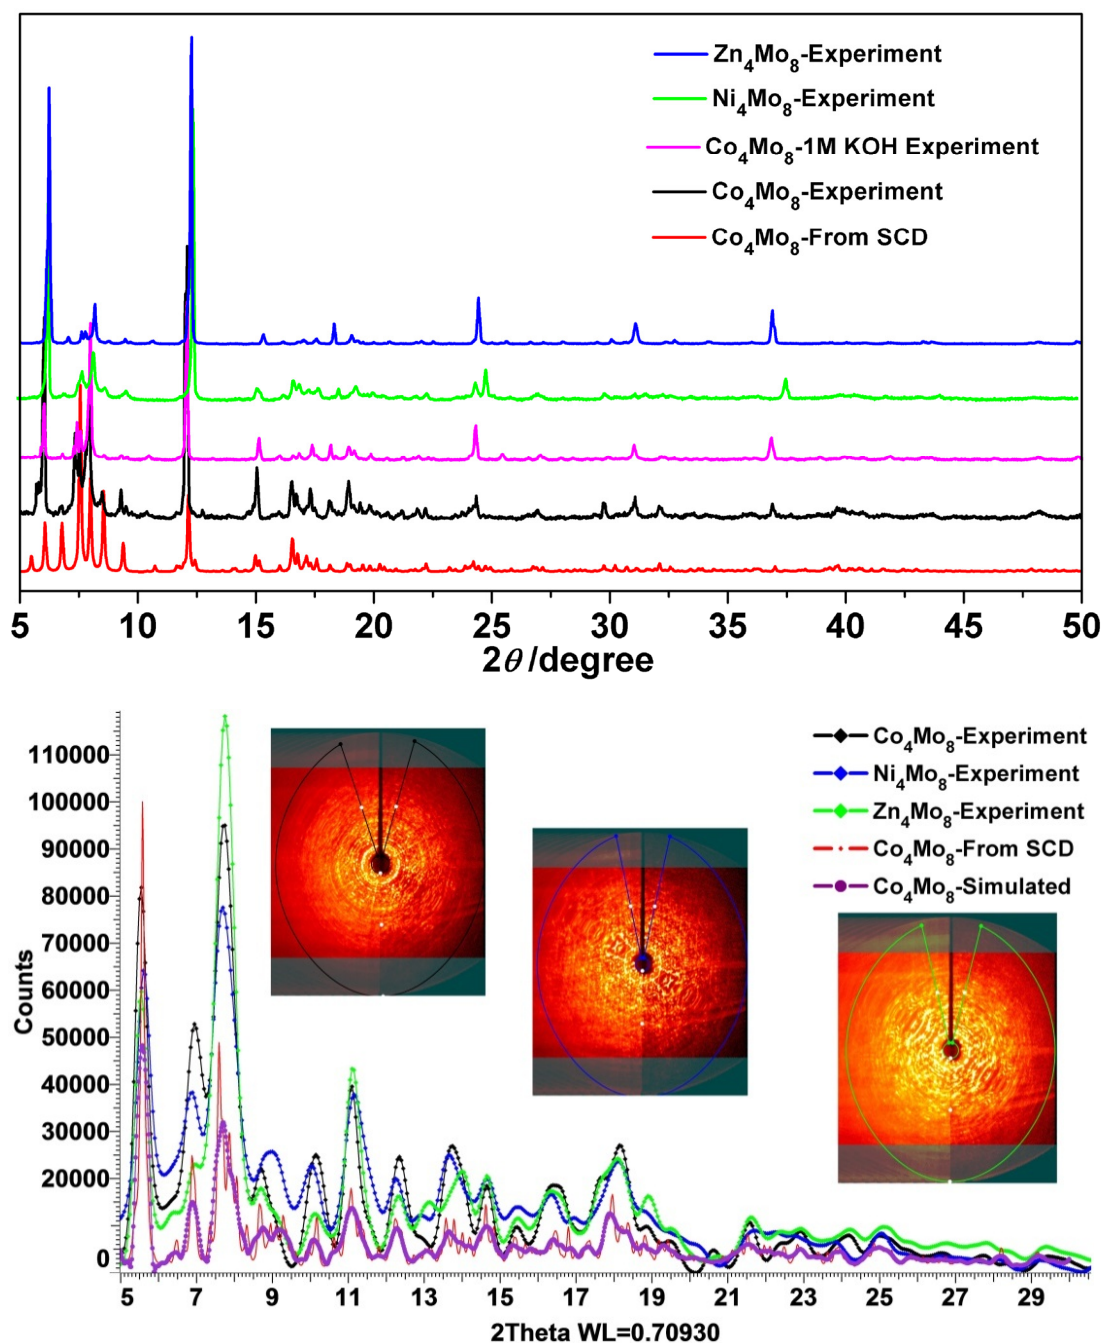

**Fig. S1** Power (up) and single-crystal (bottom) X-ray diffraction of  $\text{Co}_4\text{Mo}_8$ ,  $\text{Ni}_4\text{Mo}_8$  and  $\text{Zn}_4\text{Mo}_8$ .

XRD patterns for compound  $\text{Co}_4\text{Mo}_8$  is accordant with the simulated one derived from the single crystal X-ray data (SCD), confirming the pure phase of the samples of  $\text{Co}_4\text{Mo}_8$ . Power/single-crystal X-ray diffraction confirmed the formation of the isomers of  $\text{Co}_4\text{Mo}_8$  for  $\text{Ni}_4\text{Mo}_8$  and  $\text{Zn}_4\text{Mo}_8$ . Furthermore, the XRD of activated  $\text{Co}_4\text{Mo}_8$  (80 °C for 10h in vacuum) immersed in 1M KOH for 12 h showed similar peak distributions to  $\text{Co}_4\text{Mo}_8$  crystals.

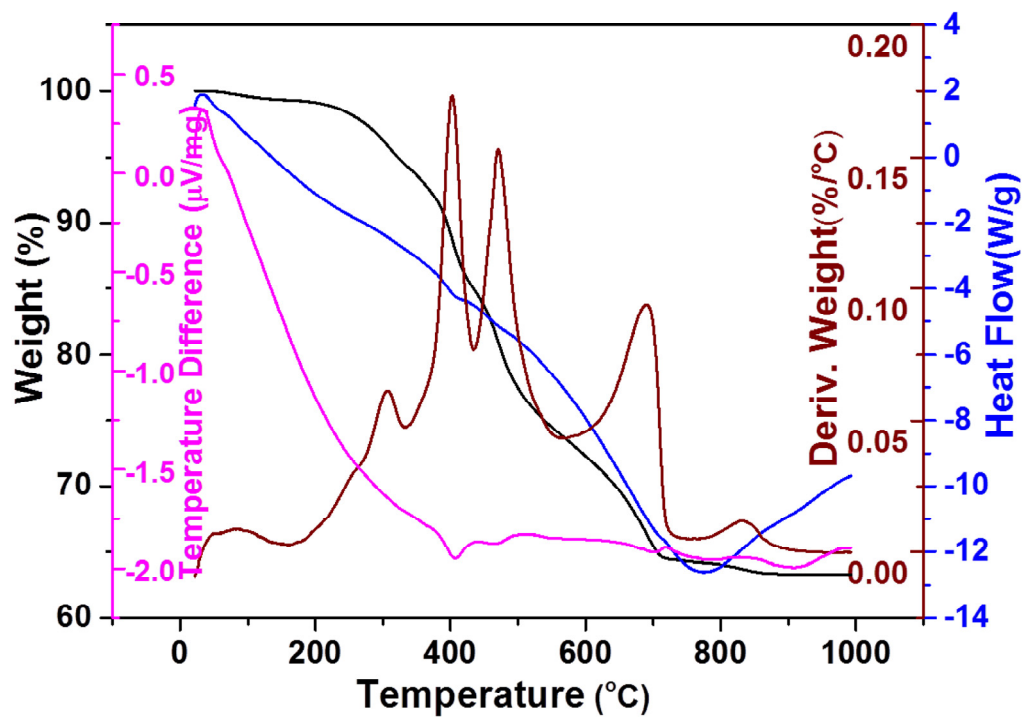

Fig. S2 TGA curves of compound  $\text{Co}_4\text{Mo}_8$  in  $\text{N}_2$ .

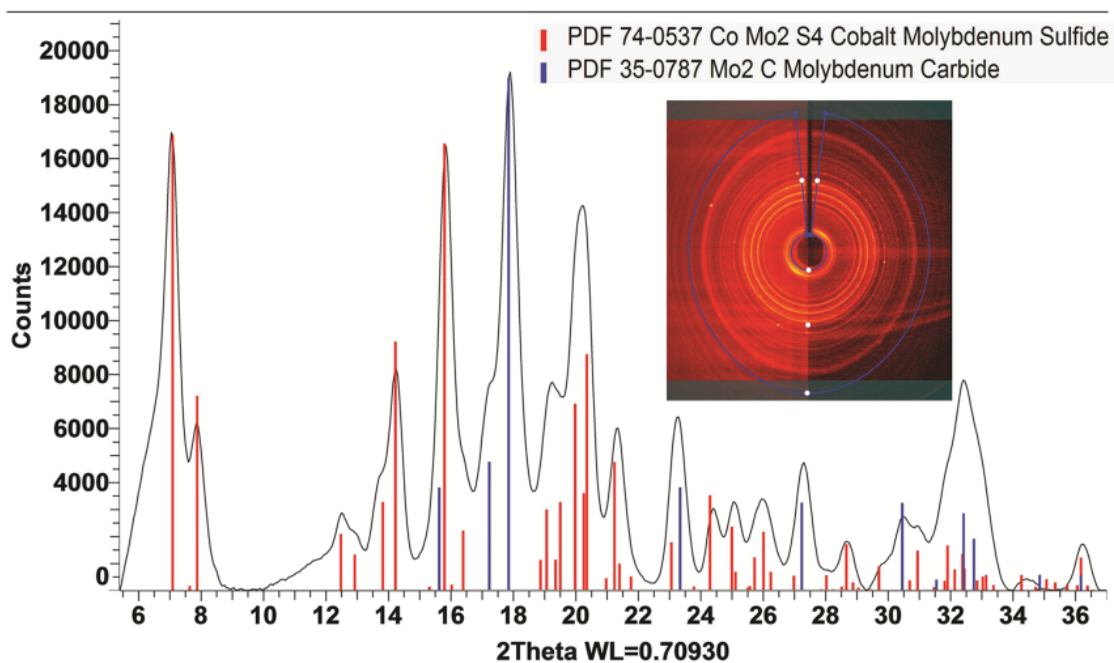

Fig. S3 The XRD of the final decomposition of TGA. The final decomposition product at  $1000^\circ\text{C}$  was found to be the mixture of  $\text{CoMo}_2\text{S}_4$  and  $\text{Mo}_2\text{C}$ .

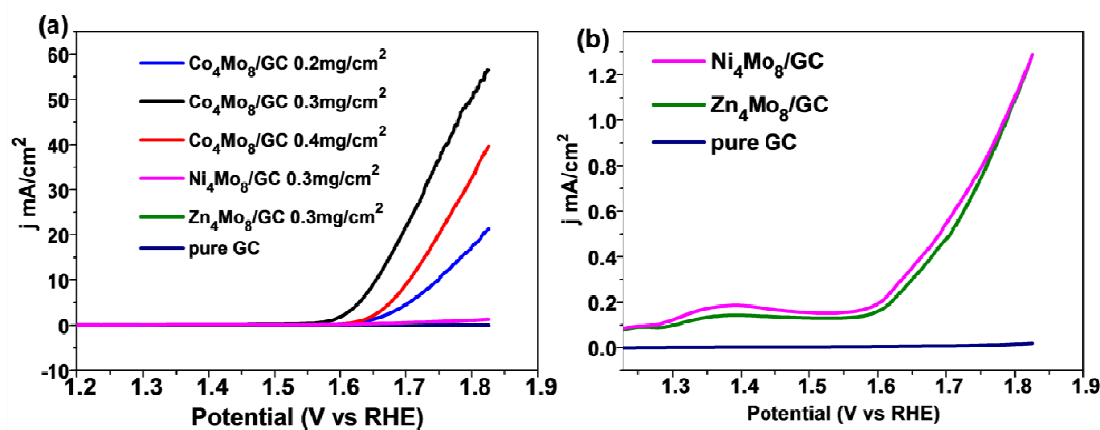

**Fig. S4** (a) OER linear sweeping voltammetry (LSV) curves of the **M<sub>4</sub>Mo<sub>8</sub>** (M = Co, Ni, Zn) materials on GC and pure GC; (b) Amplified LSV of **Ni<sub>4</sub>Mo<sub>8</sub>/GC** and **Zn<sub>4</sub>Mo<sub>8</sub>/GC**.

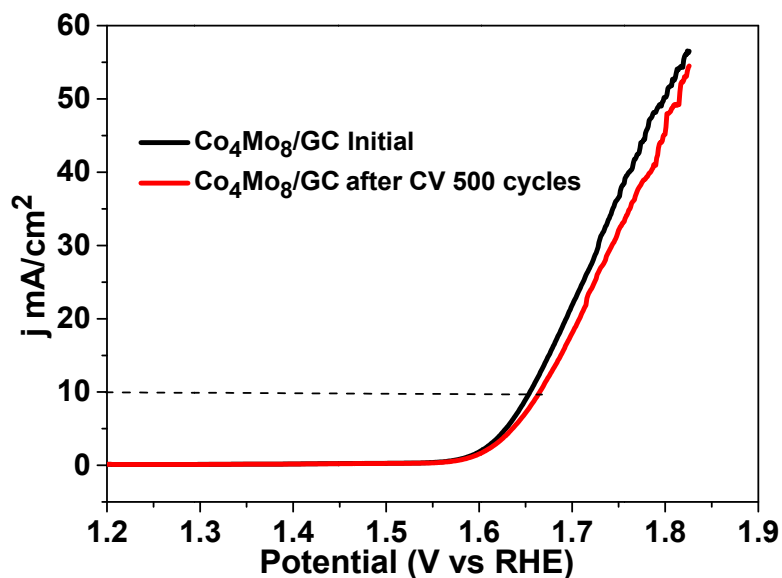

**Fig. S5** OER linear sweeping voltammetry curves of the **Co<sub>4</sub>Mo<sub>8</sub>** (crystal) materials with mass loading 0.3mg/cm<sup>2</sup> on GC.

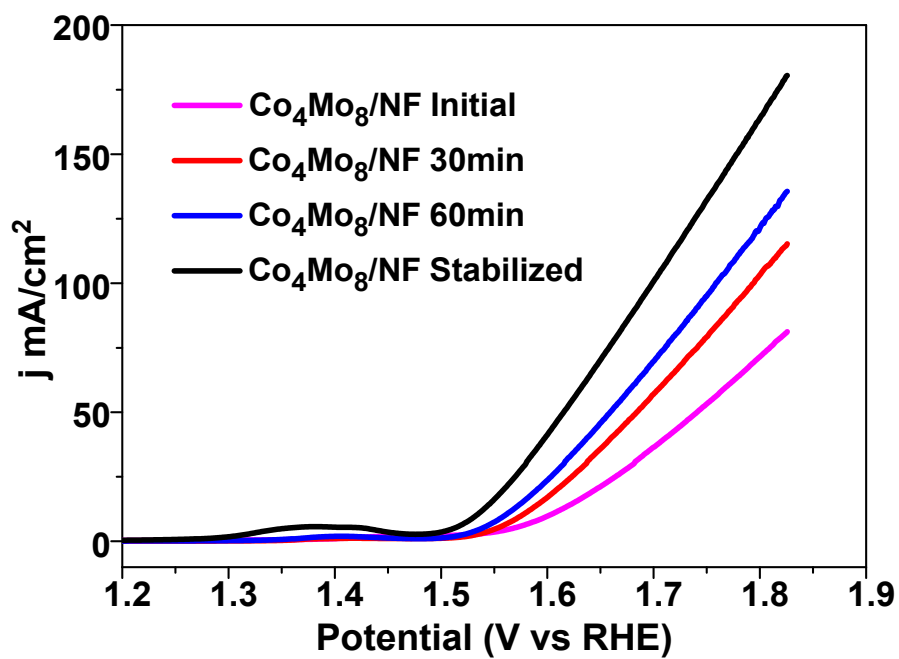

Fig. S6 Time-dependent LSV curves of  $\text{Co}_4\text{Mo}_8/\text{NF}$  at  $\text{pH} = 14$ .

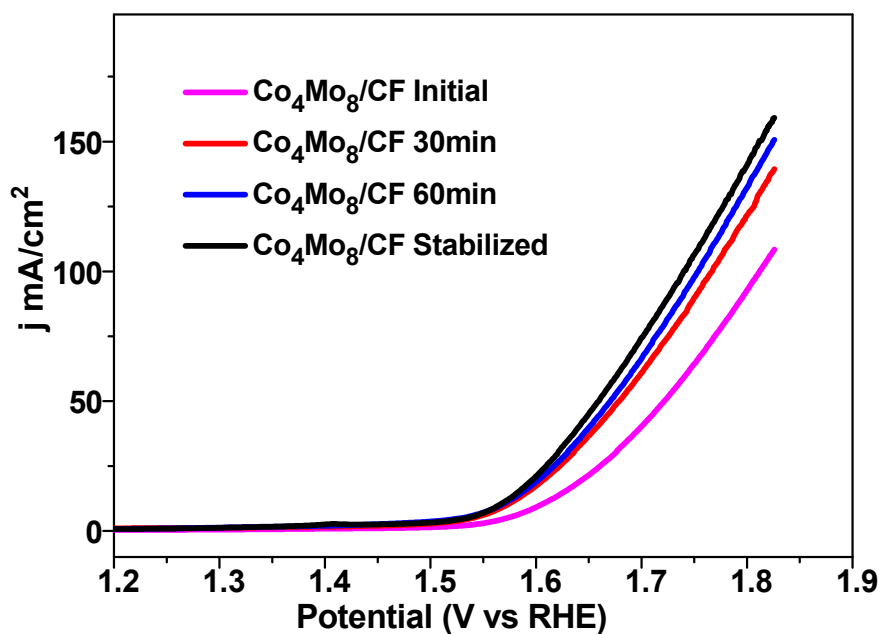

Fig. S7 Time-dependent LSV curves of  $\text{Co}_4\text{Mo}_8/\text{CF}$  at  $\text{pH} = 14$ .

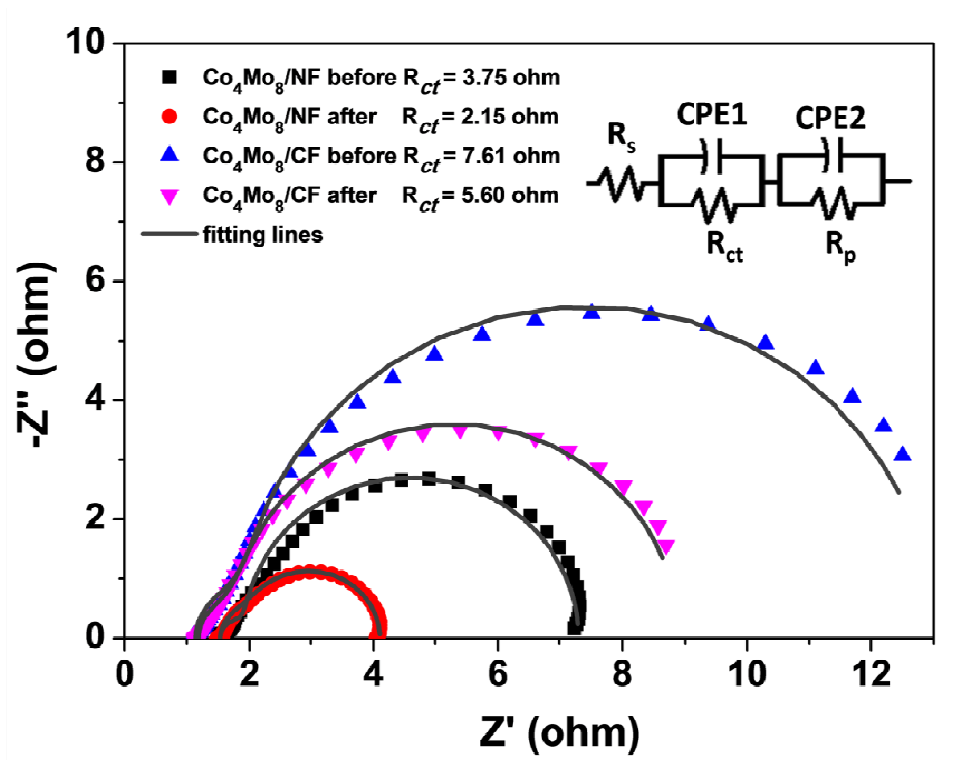

**Fig. S8** Nyquist plots of  $\text{Co}_4\text{Mo}_8/\text{NF}$  and  $\text{Co}_4\text{Mo}_8/\text{CF}$  before and after 24h-long electrocatalytic OER over a frequency range from 0.01 Hz to  $10^5$  Hz. Insert: the equivalent electric circuit was used to fit the data (Ref. *Angew. Chem. Int. Ed.*, 2018, 57, 9660).

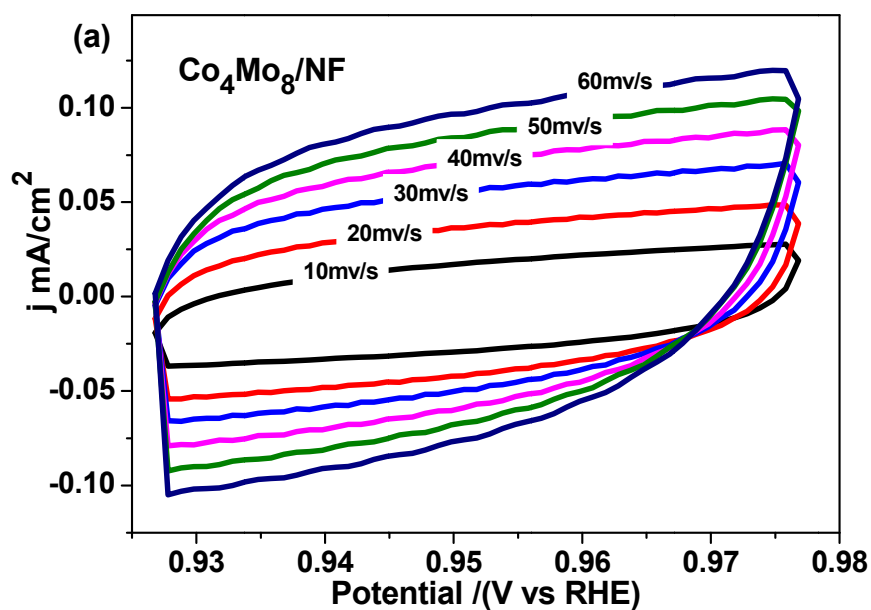

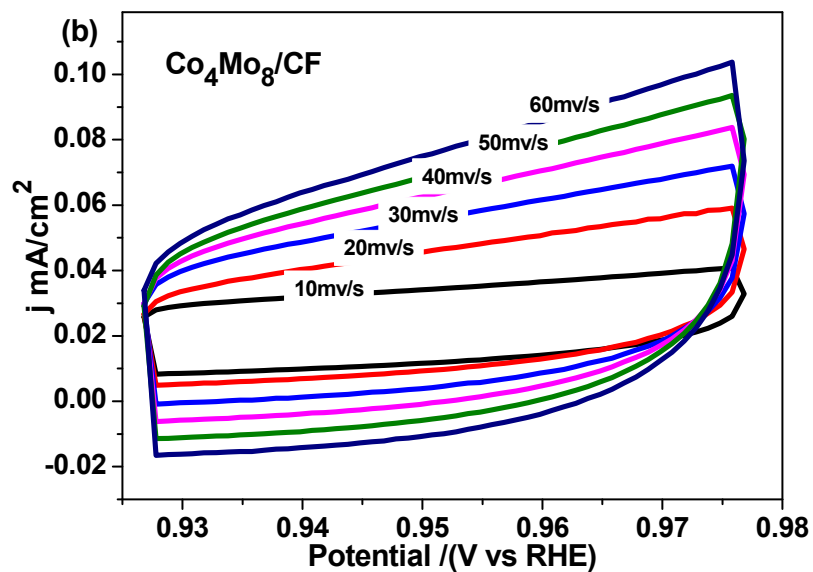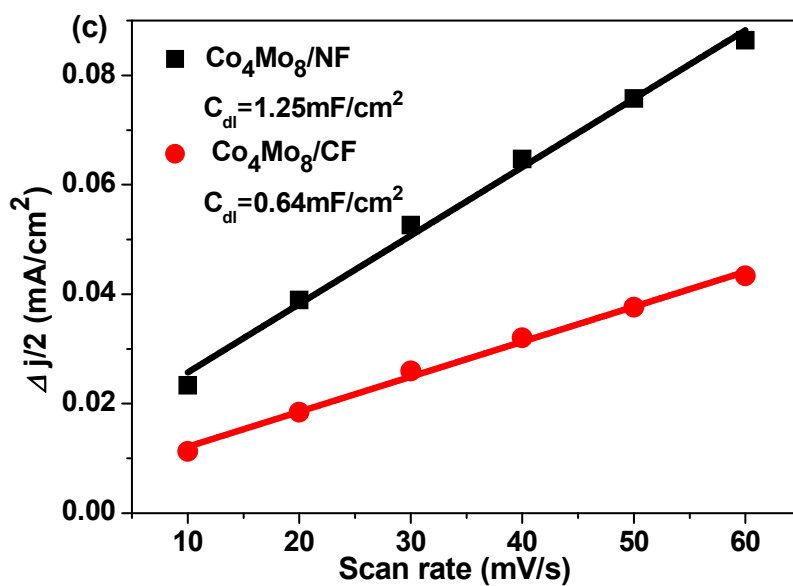

**Fig. S9** The cyclic voltammograms (CVs) measurements with various scan rates for (a)  $\text{Co}_4\text{Mo}_8/\text{NF}$  and (b)  $\text{Co}_4\text{Mo}_8/\text{CF}$  in 1.0 M KOH; (c) the capacitive current density ( $J_a/2 - J_c/2$ ) as a function of scan rate in the region of 0.9268~0.9768 V vs. RHE.



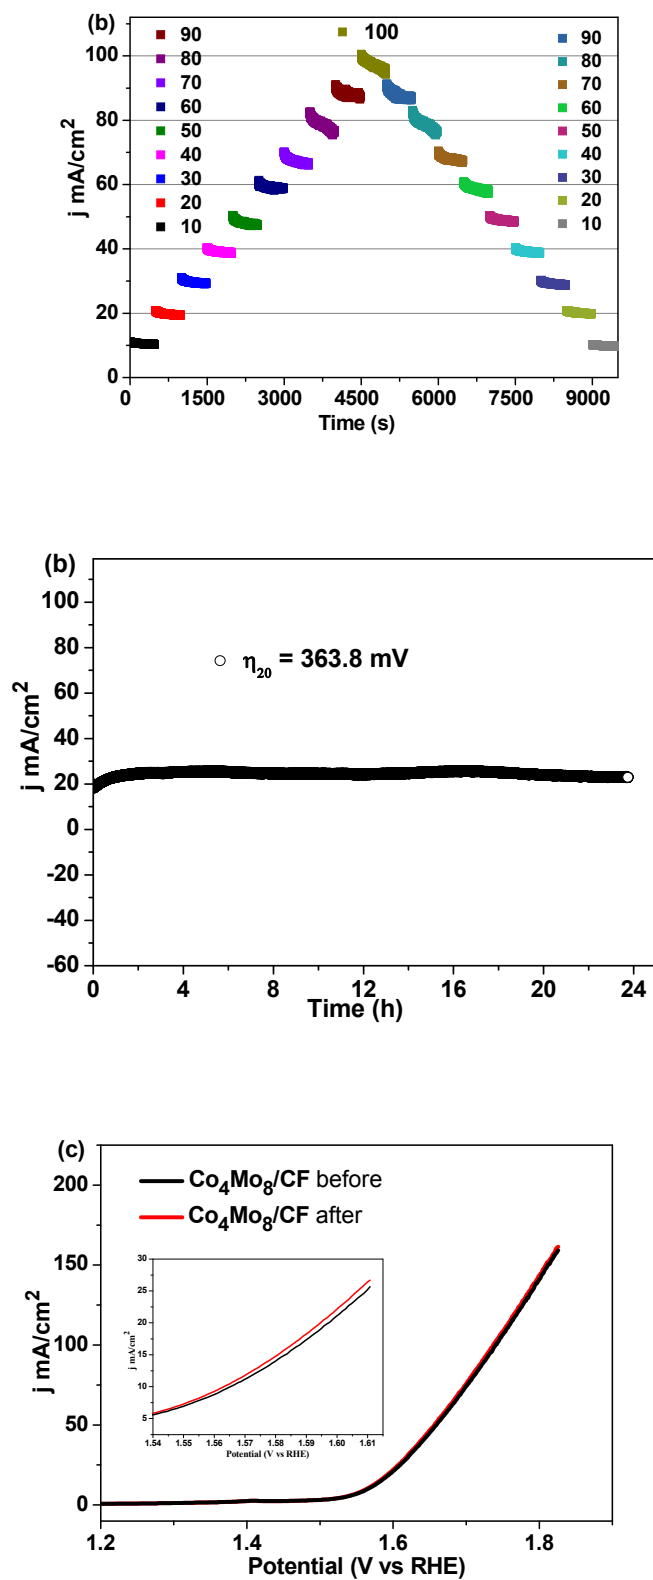

**Fig. S10** (a) Stage stability test per 500s for  $\text{Co}_4\text{Mo}_8/\text{CF}$ ; (b) The prolonged chronoamperometric profiles of  $\text{Co}_4\text{Mo}_8/\text{CF}$  at 363.8 mV for 24h; (c) Polarization curves before and after 24h-long electrocatalytic OER.

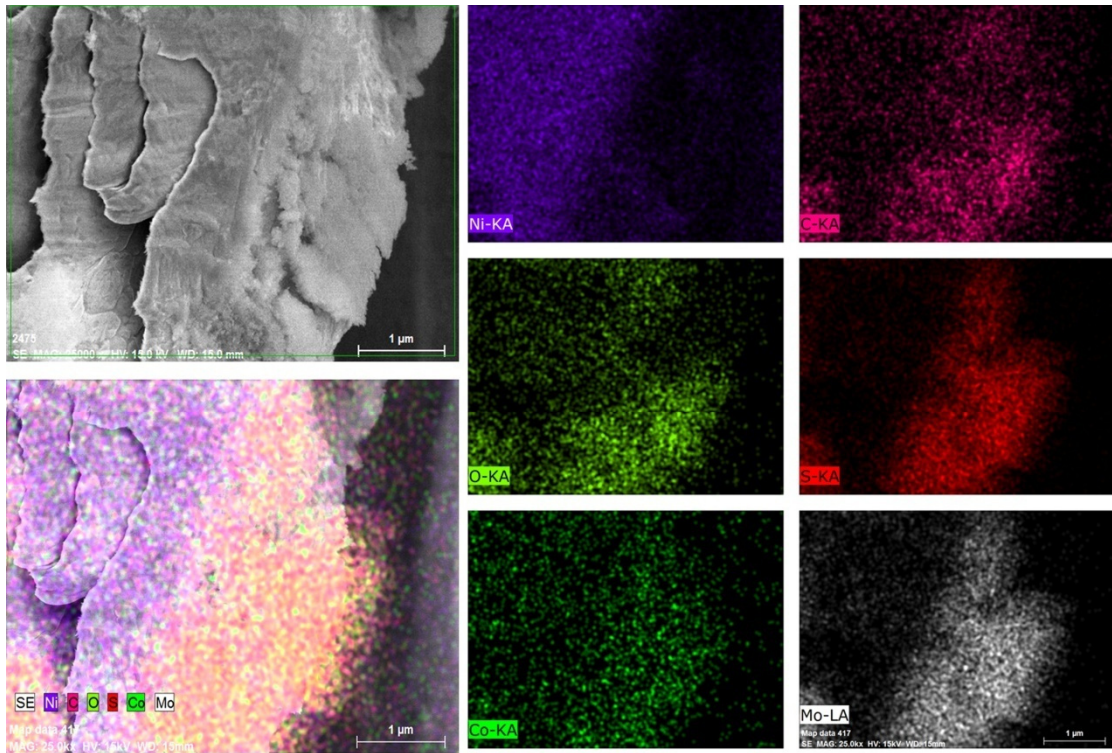

(a)  $\text{Co}_4\text{Mo}_8/\text{NF}$  initial

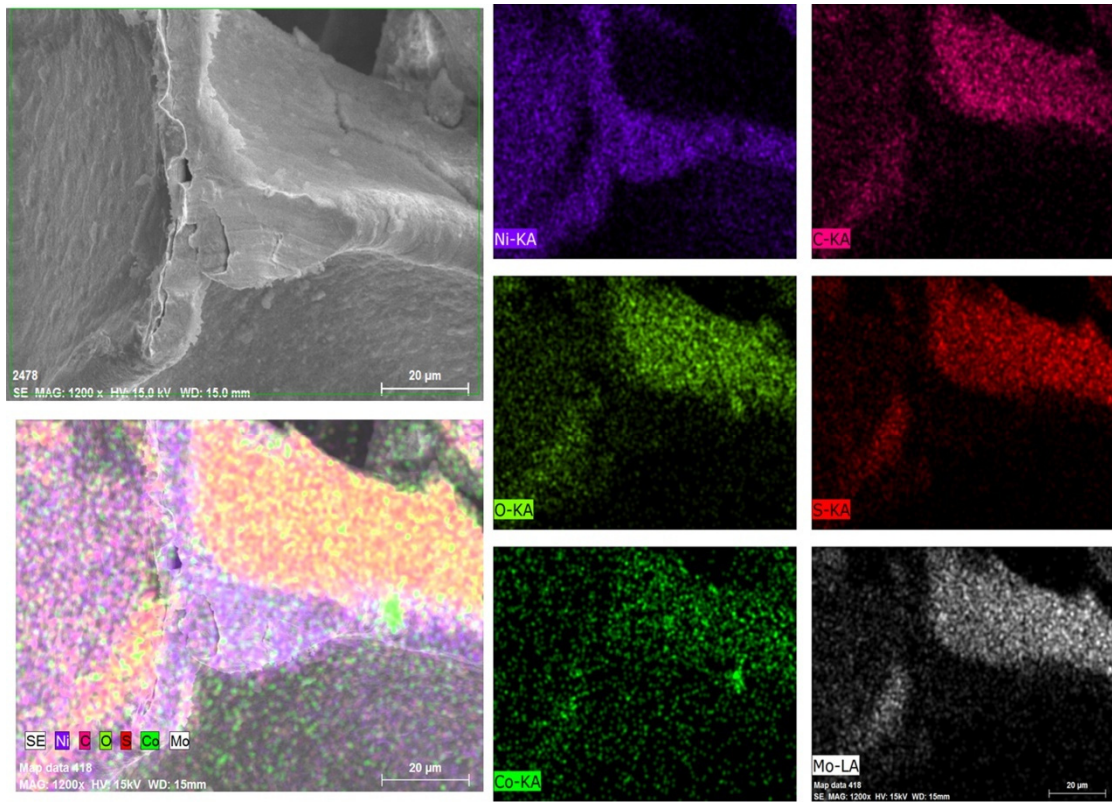

(b)  $\text{Co}_4\text{Mo}_8/\text{NF}$  after



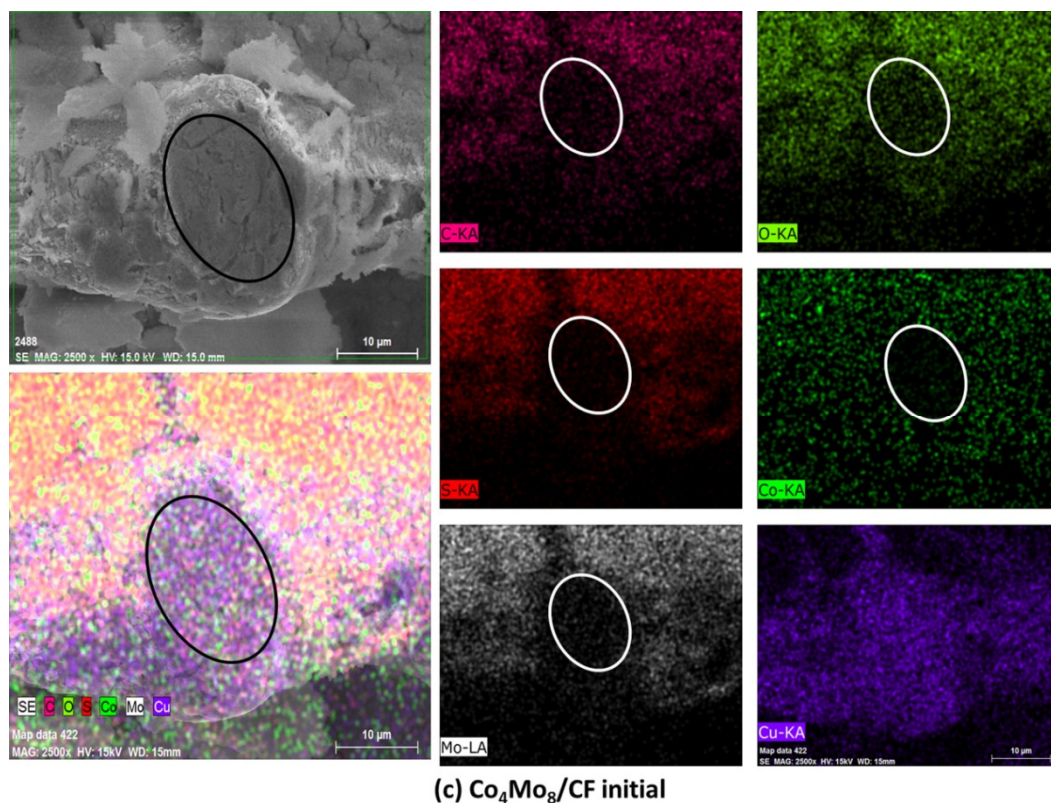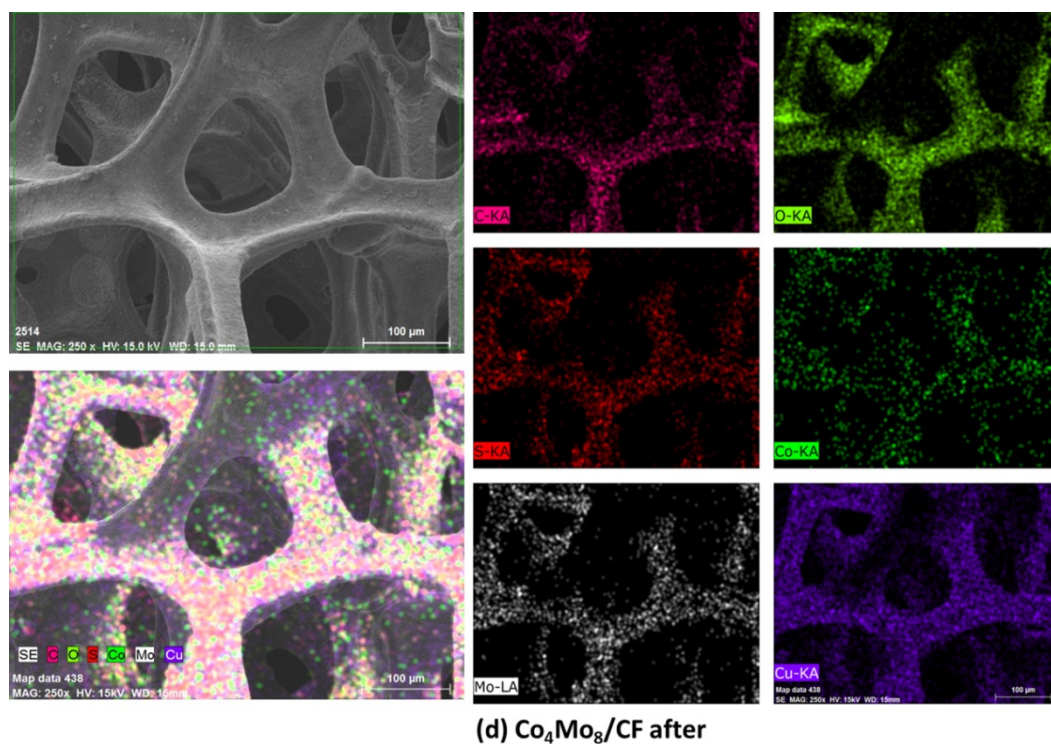

**Fig. S11** Scanning electron microscope (SEM) elemental mapping image of  $\{\text{Co}_4\text{Mo}_8\}$  at different stages: (a)  $\text{Co}_4\text{Mo}_8/\text{NF}$  initial, (b)  $\text{Co}_4\text{Mo}_8/\text{NF}$  after, (c)  $\text{Co}_4\text{Mo}_8/\text{CF}$  initial, and (d)  $\text{Co}_4\text{Mo}_8/\text{CF}$  after .

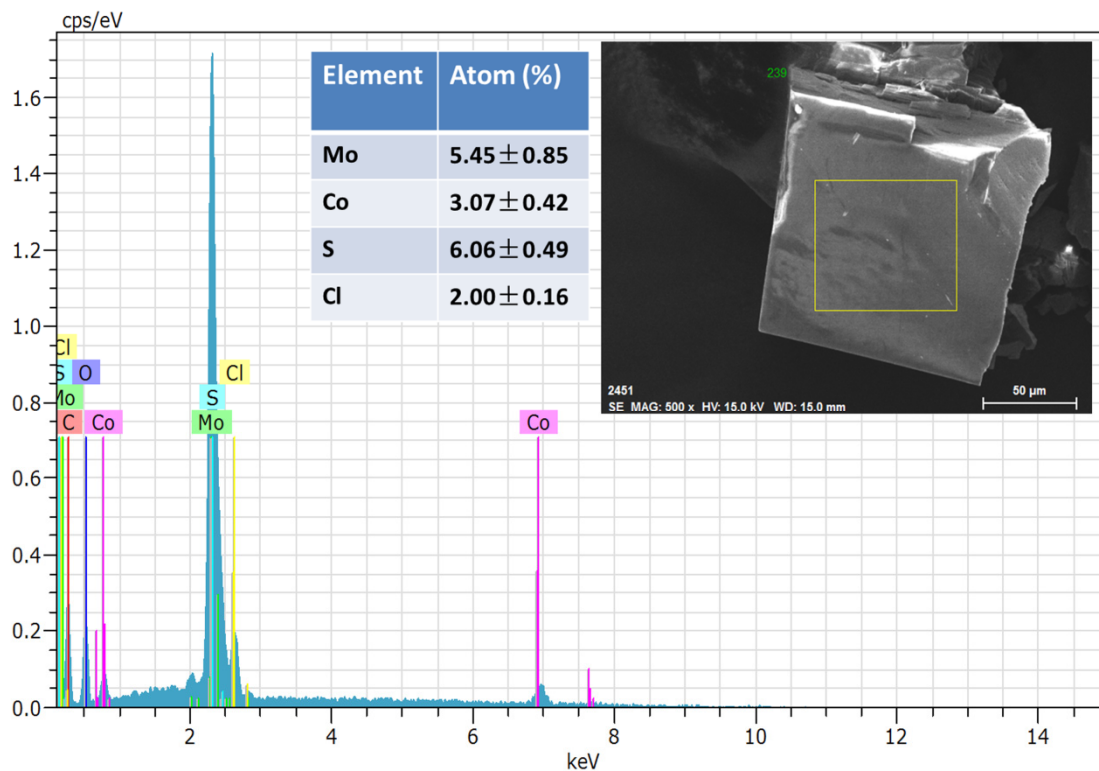

(a)  $\text{Co}_4\text{Mo}_8$ -as synthesized

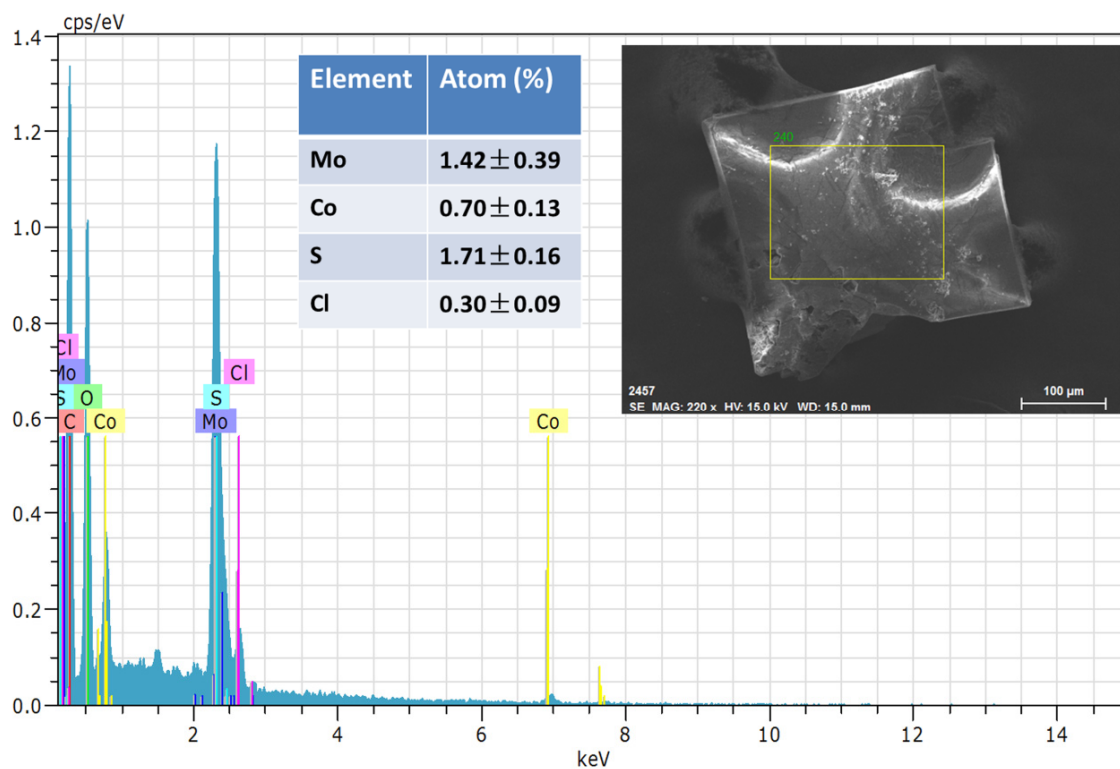

(b)  $\text{Co}_4\text{Mo}_8$ - Activated

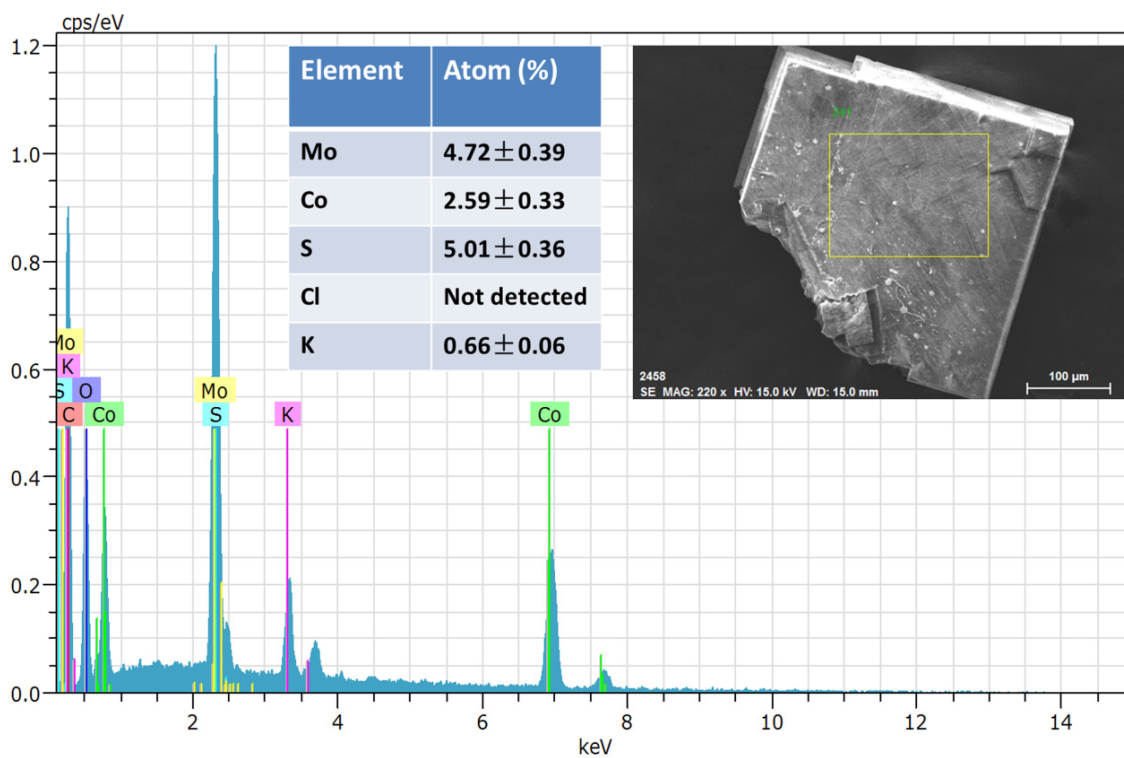

(c)  $\text{Co}_4\text{Mo}_8$ -as activated-in 1M KOH

**Fig. S12** EDX analysis of  $\text{Co}_4\text{Mo}_8$  at different stages: (a)  $\text{Co}_4\text{Mo}_8$ -as synthesized, (b)  $\text{Co}_4\text{Mo}_8$ -Activated and (c)  $\text{Co}_4\text{Mo}_8$ -activated-in 1M KOH.

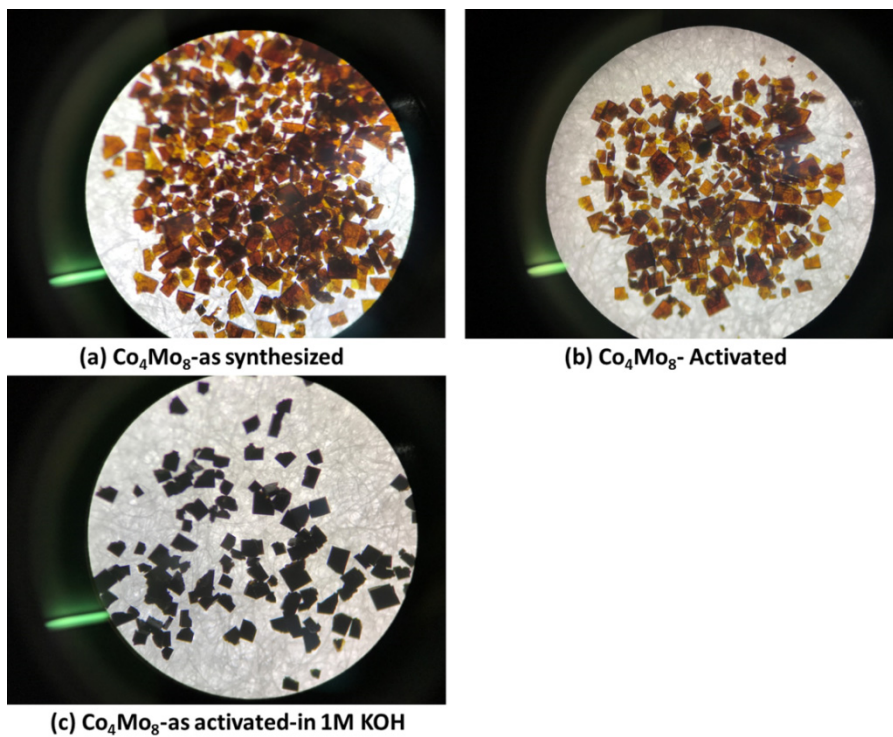

**Fig. S13** The microscope of  $\text{Co}_4\text{Mo}_8$  at different stages: (a)  $\text{Co}_4\text{Mo}_8$ -as synthesized, (b)  $\text{Co}_4\text{Mo}_8$ -activated and (c)  $\text{Co}_4\text{Mo}_8$ -activated-in 1M KOH.



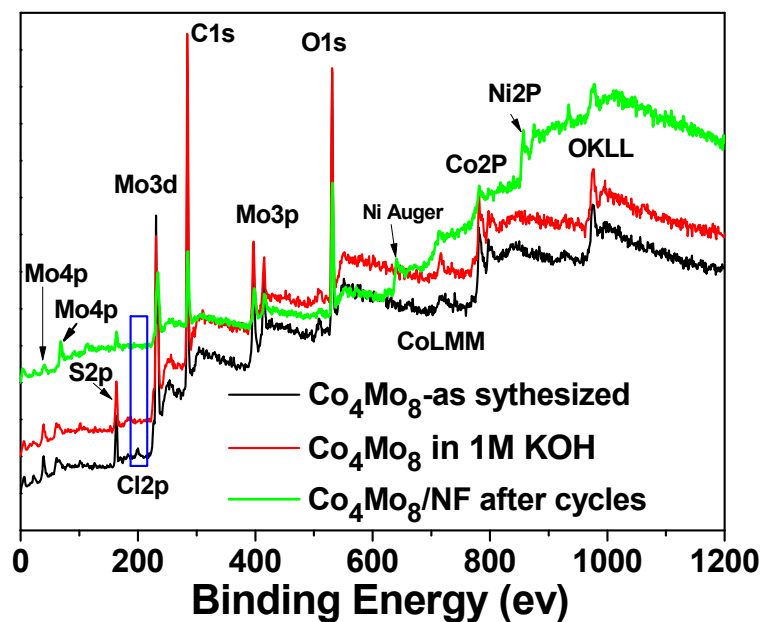

**Fig. S14** The XPS survey of  $\text{Co}_4\text{Mo}_8$ -as synthesized,  $\text{Co}_4\text{Mo}_8$ -activated-in 1M KOH, and  $\text{Co}_4\text{Mo}_8/\text{NF}$  after cycles (after stabilized LSV).

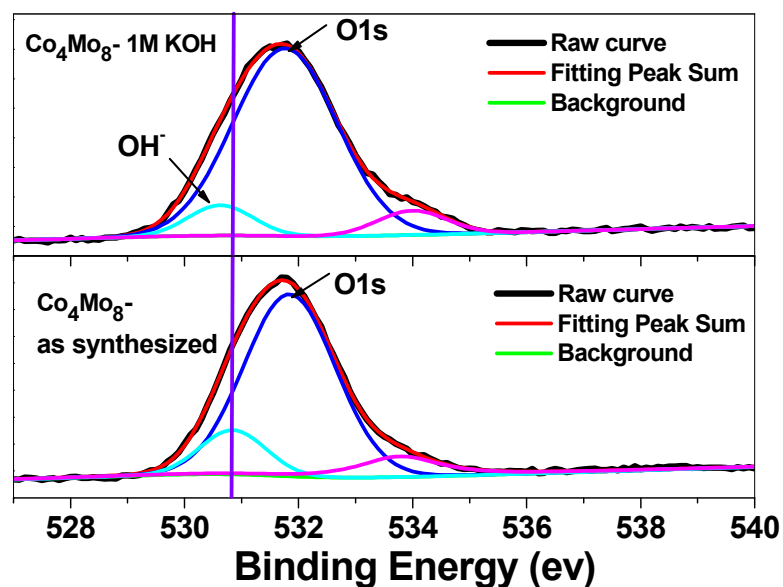

**Fig. S15** High-resolution O1s XPS of  $\text{Co}_4\text{Mo}_8$ -as synthesized and  $\text{Co}_4\text{Mo}_8$ -activated-in 1M KOH.

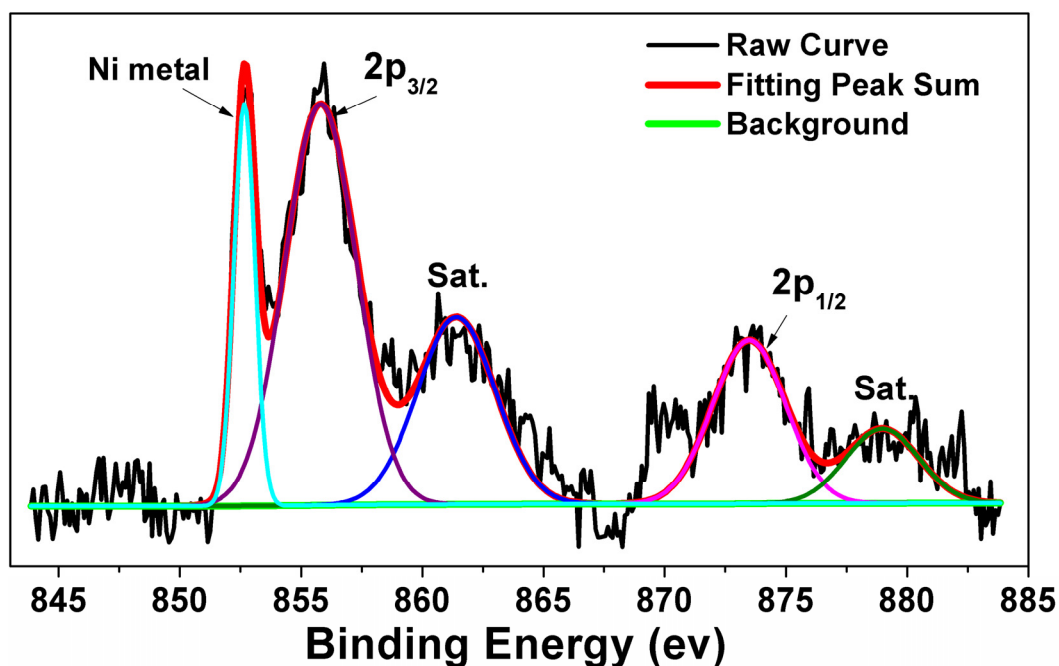

**Fig. S16** High-resolution Ni2p XPS. The sample was prepared by sonication of  $\text{Co}_4\text{Mo}_8/\text{NF}$  in methanol/chloroform (1:1) mixture to remove the surface fabricated  $\text{Co}_4\text{Mo}_8$ . The obtained XPS shows typical bonding peaks at ca. 852.7 eV that can be assigned to Ni metal. The satellite (Sat.) peak (ca. 861.4 eV) shift to higher binding energy compared with Ni-O analogues (below 861.0 eV) indicated a modified local electronic structure of Ni surface, likely due to the binding between  $\text{Co}_4\text{Mo}_8$  and NF, that is, Ni-S signals.

Ref. H.W. Nesbitt, D. Legrand and G.M. Bancroft, Interpretation of Ni2p XPS spectra of Ni conductors and Ni insulators, *Phys. Chem. Minerals.*,2000, **27**, 357-366.

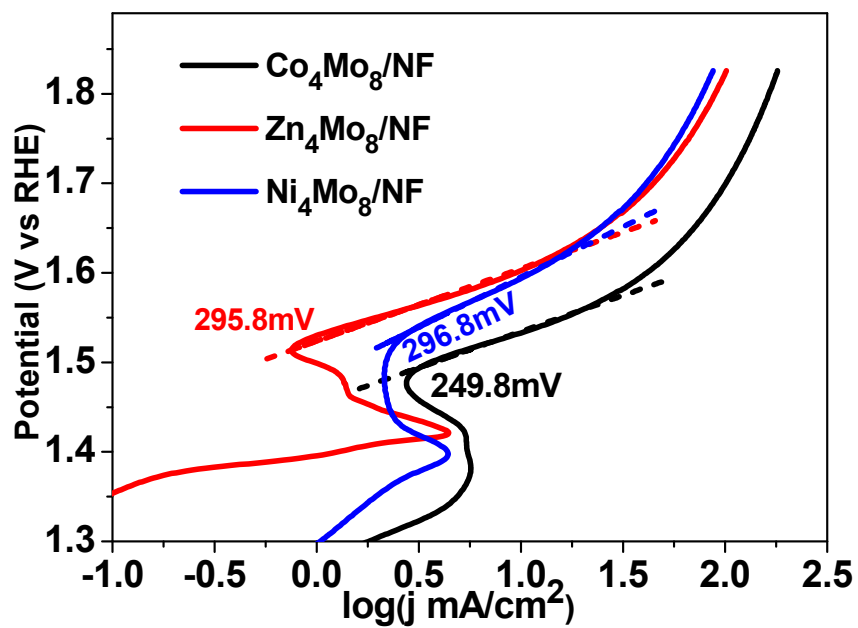

**Fig. S17** Comparing onset potential of  $\text{Co}_4\text{Mo}_8/\text{NF}$ ,  $\text{Ni}_4\text{Mo}_8/\text{NF}$ , and  $\text{Zn}_4\text{Mo}_8/\text{NF}$  electrodes

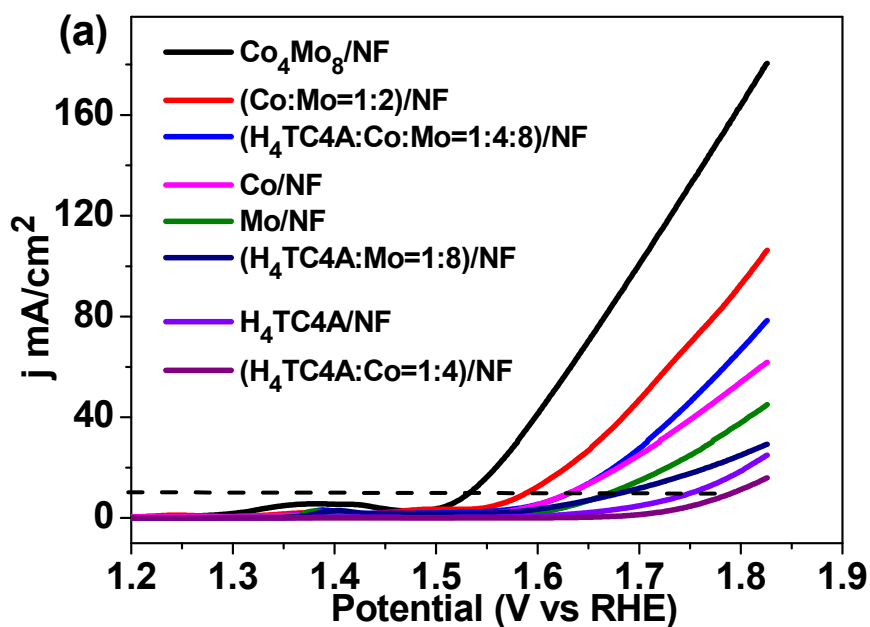



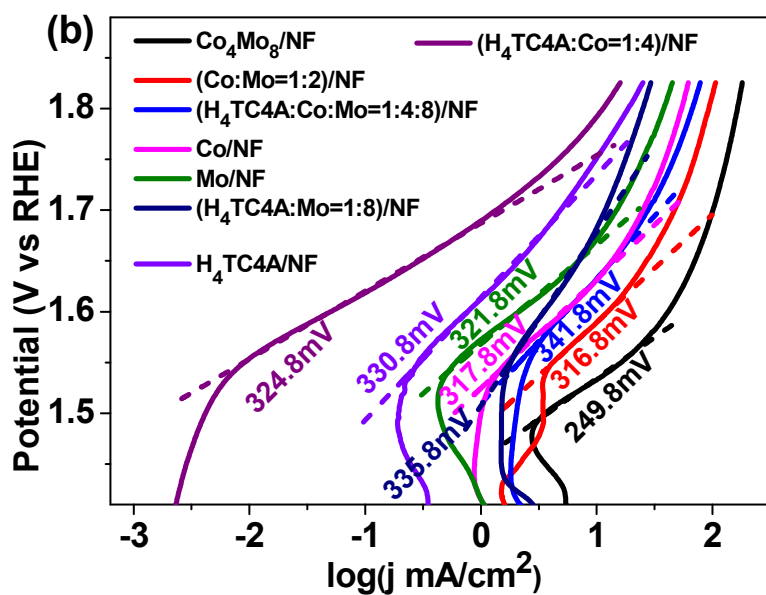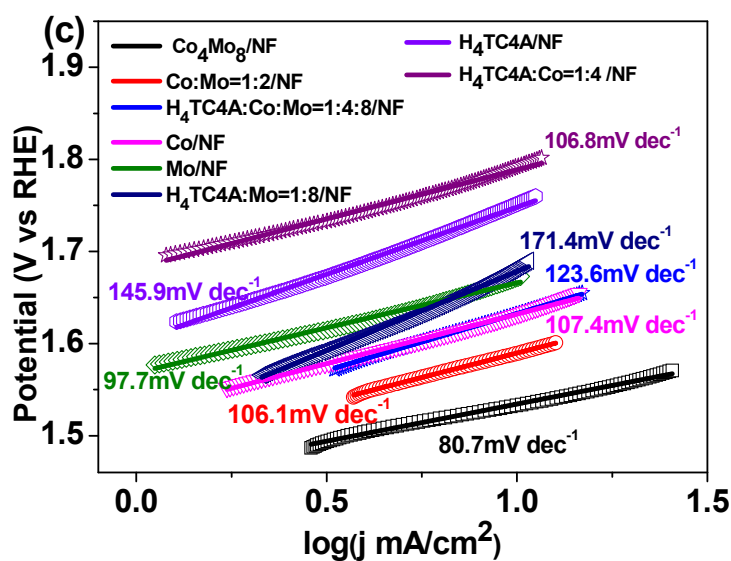

**Fig. S18** Single component and simple combination of multiple components polarization curves (LSV) (a), onset potential (b) and tafel plots (c) of (Co:Mo=1:2)/NF, (H<sub>4</sub>TC4A:Co:Mo=1:4:8)/NF, Co/NF, Mo/NF, (H<sub>4</sub>TC4A:Mo=1:8)/NF, H<sub>4</sub>TC4A/NF, (H<sub>4</sub>TC4A:Co=1:4)/NF (Co: Co(CH<sub>3</sub>COO)<sub>2</sub>·4H<sub>2</sub>O; Mo: (NH<sub>4</sub>)<sub>2</sub>MoS<sub>2</sub>O<sub>2</sub>) in 1 M KOH solution at a scan rate of 5 mV/s.

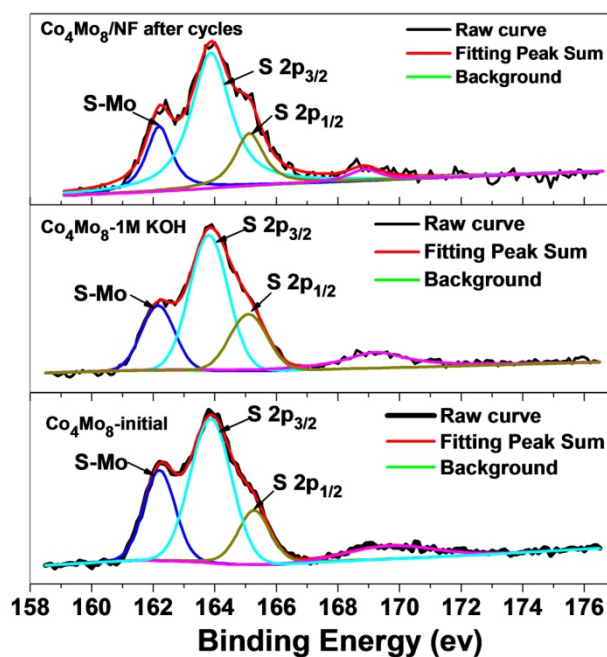

**Fig. S19** High-resolution S2p XPS of  $\text{Co}_4\text{Mo}_8$ -as synthesized and  $\text{Co}_4\text{Mo}_8$ -activated-in 1M KOH.

**Table S1** Crystal data and structural refinement parameters for  $(\text{NH}_4)_2\text{MoS}_2\text{O}_2$  and  $\text{Co}_4\text{Mo}_8$

|                                 |                                              |                                                                                       |
|---------------------------------|----------------------------------------------|---------------------------------------------------------------------------------------|
| Formula                         | $\text{H}_8\text{MoN}_2\text{O}_2\text{S}_2$ | $\text{C}_{45}\text{H}_{61}\text{Cl}_4\text{Co}_4\text{Mo}_8\text{NO}_{24}\text{S}_8$ |
| Mr                              | 228.16                                       | 2397.52                                                                               |
| Crystal system                  | Monoclinic                                   | Monoclinic                                                                            |
| space group                     | $C2/c$ (No. 15)                              | $P2_1/n$ (No. 14)                                                                     |
| Temperature (K)                 | 296                                          | 296                                                                                   |
| $a$ (Å)                         | 11.4090(14)                                  | 16.9518(9)                                                                            |
| $b$ (Å)                         | 7.3036(6)                                    | 17.0056(9)                                                                            |
| $c$ (Å)                         | 9.4236(18)                                   | 30.0349(14)                                                                           |
| $\alpha$ (°)                    | 90                                           | 90                                                                                    |
| $\beta$ (°)                     | 117.389(3)                                   | 104.113(2)                                                                            |
| $\gamma$ (°)                    | 90                                           | 90                                                                                    |
| Volume(Å <sup>3</sup> )         | 697.22(17)                                   | 8397.0 (7)                                                                            |
| $Z$                             | 4                                            | 4                                                                                     |
| $D_c$ (g/cm <sup>3</sup> )      | 2.174                                        | 1.896                                                                                 |
| $\mu$ (mm <sup>-1</sup> )       | 2.394                                        | 2.304                                                                                 |
| Reflections collected           | 3472                                         | 100895                                                                                |
| Unique data( $R_{\text{int}}$ ) | 611                                          | 14879                                                                                 |
| $GOF$ on $F^2$                  | 1.05                                         | 1.06                                                                                  |
| $R_1$ [ $I > 2\sigma(I)$ ]      | 0.0175                                       | 0.0896                                                                                |
| $wR_2$                          | 0.0438                                       | 0.2593                                                                                |

$${}^a R_1 = \frac{\sum ||F_o| - |F_c||}{\sum |F_o|}; {}^b wR_2 = \left\{ \frac{\sum [w(F_o^2 - F_c^2)^2]}{\sum [w(F_o^2)^2]} \right\}^{1/2}$$

**Table S2** Selected bond distances (Å) and BVS calculations for **Co<sub>4</sub>Mo<sub>8</sub>**

| Band        | Distance  | r     | Value | Band        | Distance  | r     | Value |
|-------------|-----------|-------|-------|-------------|-----------|-------|-------|
| Co(1)-O(4)  | 1.934(10) | 1.692 | 0.520 | Mo(3)-O(15) | 1.692(12) | 1.907 | 1.788 |
| Co(1)-O(1)  | 1.978(5)  | 1.692 | 0.462 | Mo(3)-O(7)  | 1.964(10) | 1.907 | 0.857 |
| Co(1)-O(5)  | 2.051(9)  | 1.692 | 0.379 | Mo(3)-O(6)  | 1.991(11) | 1.907 | 0.797 |
| Co(1)-O(12) | 2.083(10) | 1.692 | 0.348 | Mo(3)-O(21) | 2.056(11) | 1.907 | 0.669 |
| Co(1)-S(1)  | 2.499(4)  | 2.06  | 0.305 | Mo(3)-S(6)  | 2.300(5)  | 2.35  | 1.145 |
| Co(1)-Cl(1) | 2.687(4)  | 2.01  | 0.160 | valence     |           |       | 5.256 |
| valence     |           |       | 2.174 | Mo(4)-O(16) | 1.682(13) | 1.907 | 1.837 |
| Co(2)-O(3)  | 1.952(10) | 1.692 | 0.495 | Mo(4)-O(7)  | 1.952(10) | 1.907 | 0.885 |
| Co(2)-O(4)  | 1.991(10) | 1.692 | 0.446 | Mo(4)-O(8)  | 1.984(10) | 1.907 | 0.812 |
| Co(2)-O(11) | 2.073(9)  | 1.692 | 0.357 | Mo(4)-O(22) | 2.081(10) | 1.907 | 0.625 |
| Co(2)-O(10) | 2.075(10) | 1.692 | 0.355 | Mo(4)-S(6)  | 2.315(5)  | 2.35  | 1.099 |
| Co(2)-S(4)  | 2.500(4)  | 2.06  | 0.304 | valence     |           |       | 5.258 |
| Co(2)-Cl(1) | 2.685(4)  | 2.01  | 0.161 | Mo(5)-O(17) | 1.681(11) | 1.907 | 1.842 |
| valence     |           |       | 2.118 | Mo(5)-O(9)  | 1.948(10) | 1.907 | 0.895 |
| Co(3)-O(2)  | 1.954(10) | 1.692 | 0.493 | Mo(5)-O(8)  | 2.000(10) | 1.907 | 0.778 |
| Co(3)-O(3)  | 1.983(10) | 1.692 | 0.455 | Mo(5)-O(22) | 2.081(11) | 1.907 | 0.625 |
| Co(3)-O(9)  | 2.054(10) | 1.692 | 0.376 | Mo(5)-S(7)  | 2.302(5)  | 2.35  | 1.139 |
| Co(3)-O(8)  | 2.083(10) | 1.692 | 0.348 | valence     |           |       | 5.279 |
| Co(3)-S(3)  | 2.511(4)  | 2.06  | 0.296 | Mo(6)-O(18) | 1.672(12) | 1.907 | 1.887 |
| Co(3)-Cl(1) | 2.680(4)  | 2.01  | 0.164 | Mo(6)-O(9)  | 1.941(10) | 1.907 | 0.912 |
| valence     |           |       | 2.132 | Mo(6)-O(10) | 1.995(10) | 1.907 | 0.788 |
| Co(4)-O(1)  | 1.952(10) | 1.692 | 0.495 | Mo(6)-O(23) | 2.097(10) | 1.907 | 0.598 |
| Co(4)-O(2)  | 1.992(10) | 1.692 | 0.444 | Mo(6)-S(7)  | 2.324(5)  | 1.907 | 1.073 |
| Co(4)-O(7)  | 2.045(10) | 1.692 | 0.385 | valence     |           |       | 5.258 |
| Co(4)-O(6)  | 2.079(10) | 1.692 | 0.351 | Mo(7)-O(19) | 1.671(11) | 1.907 | 1.892 |
| Co(4)-S(2)  | 2.505(4)  | 2.06  | 0.300 | Mo(7)-O(11) | 1.958(10) | 1.907 | 0.871 |
| Co(4)-Cl(1) | 2.676(4)  | 2.01  | 0.165 | Mo(7)-O(10) | 2.003(10) | 1.907 | 0.771 |
| valence     |           |       | 2.140 | Mo(7)-O(23) | 2.089(10) | 1.907 | 0.611 |
| Mo(1)-O(13) | 1.675(12) | 1.907 | 1.872 | Mo(7)-S(8)  | 2.295(5)  | 2.35  | 1.160 |
| Mo(1)-O(5)  | 1.957(10) | 1.907 | 0.874 | valence     |           |       | 5.305 |
| Mo(1)-O(12) | 2.002(10) | 1.907 | 0.774 | Mo(8)-O(20) | 1.664(12) | 1.907 | 1.929 |
| Mo(1)-O(24) | 2.084(10) | 1.907 | 0.620 | Mo(8)-O(11) | 1.941(9)  | 1.907 | 0.912 |
| Mo(1)-S(5)  | 2.307(5)  | 2.35  | 1.123 | Mo(8)-O(12) | 1.984(10) | 1.907 | 0.812 |
| valence     |           |       | 5.263 | Mo(8)-O(24) | 2.094(10) | 1.907 | 0.603 |
| Mo(2)-O(14) | 1.655(13) | 1.907 | 1.976 | Mo(8)-S(8)  | 2.314(5)  | 2.35  | 1.102 |
| Mo(2)-O(5)  | 1.953(9)  | 1.907 | 0.883 | valence     |           |       | 5.358 |
| Mo(2)-O(6)  | 1.989(10) | 1.907 | 0.801 |             |           |       |       |
| Mo(2)-O(21) | 2.098(11) | 1.907 | 0.597 |             |           |       |       |
| Mo(2)-S(5)  | 2.315(5)  | 2.35  | 1.099 |             |           |       |       |
| valence     |           |       | 5.356 |             |           |       |       |

**Table. S3** Potential and Tafel slope of the reported electrocatalysts for OER. ( $\eta$ : overpotential)

| Catalyst                             | onset potential (mV) | $\eta_{10}$ (mV) | Tafel (mV/ dec) |
|--------------------------------------|----------------------|------------------|-----------------|
| Co <sub>4</sub> Mo <sub>8</sub> /NF  | 249.8                | 302.8            | 80.7            |
| Co <sub>4</sub> Mo <sub>8</sub> /CF  | 269.8                | 332.8            | 109.1           |
| Co <sub>4</sub> Mo <sub>8</sub> /GC  | 326.8                | 423.8            | 112.6           |
| Pure NF                              | -                    | 562.8            | -               |
| Pure CF                              | -                    | 592.8            | -               |
| Zn <sub>4</sub> Mo <sub>8</sub> /NF  | 295.8                | 371.8            | 81.0            |
| Ni <sub>4</sub> Mo <sub>8</sub> /NF  | 296.8                | 362.8            | 112.2           |
| (Co:Mo=1:2)/NF                       | 316.8                | 358.8            | 106.1           |
| (H <sub>4</sub> TC4A:Co:Mo=1:4:8)/NF | 341.8                | 401.8            | 123.6           |
| Co/NF                                | 317.8                | 400.8            | 107.4           |
| Mo/NF                                | 321.8                | 440.8            | 97.7            |
| (H <sub>4</sub> TC4A:Mo=1:8)/NF      | 335.8                | 451.8            | 171.4           |
| H <sub>4</sub> TC4A/NF               | 330.8                | 520.8            | 145.9           |
| (H <sub>4</sub> TC4A:Co=1:4)/NF      | 324.8                | 561.8            | 106.8           |

**Table. S4** Comparison of the OER performances of recently reported active catalysts with that in this work. **Precious-metal oxides, Co-based Bimetal MOFs, Co-based MOFs, Catalysts from MOF precursors** and **related Co-based Bimetal composite materials** are grouped and highlighted with different background colors.

| Catalyst                                        | Electrolyte | overpotential (mV) (at 10mA/cm <sup>2</sup> ) | Substrate/Binder | Tafel Slope (mV/dec) | Mass loading (mg/cm <sup>2</sup> ) | TOF (s <sup>-1</sup> )               | Reference                                                   |
|-------------------------------------------------|-------------|-----------------------------------------------|------------------|----------------------|------------------------------------|--------------------------------------|-------------------------------------------------------------|
| <b>Co<sub>4</sub>Mo<sub>8</sub></b>             | 1.0 M KOH   | 302.8                                         | NF/none          | 80.67                | 0.8± 0.1                           | 0.52-0.67×10 <sup>-2</sup> (300mV)   | <b>This work</b>                                            |
| <b>Zn<sub>4</sub>Mo<sub>8</sub></b>             |             | 371.8                                         |                  | 112.16               | 0.8± 0.1                           | 0.057-0.074×10 <sup>-2</sup> (300mV) |                                                             |
| <b>Ni<sub>4</sub>Mo<sub>8</sub></b>             |             | 362.8                                         |                  | 81.04                | 0.8± 0.1                           | 0.16-0.20×10 <sup>-2</sup> (300mV)   |                                                             |
| <b>Co<sub>4</sub>Mo<sub>8</sub></b>             |             | 332.8                                         | CF/none          | 109.14               | 0.8± 0.1                           | 0.27-0.35×10 <sup>-2</sup> (300mV)   |                                                             |
|                                                 |             | 423.8                                         | GC//Nafion       | 112.6                | 0.3                                | 0.055×10 <sup>-2</sup> (300mV)       |                                                             |
| IrO <sub>2</sub> /C (20 wt%)                    | 0.1 M KOH   | 370                                           | GCE/Nafion       | -                    | 0.2                                | 4.4×10 <sup>-2</sup> (300mV)         | S1. <i>Nat. Commun.</i> , 2013, <b>4</b> , 2390.            |
| RuO <sub>2</sub>                                | 1.0 M KOH   | 330                                           | GCE/Nafion       | -                    | 0.2                                | 0.47×10 <sup>-2</sup> (300mV)        | S2. <i>J. Mater. Chem. A</i> , 2015, <b>3</b> , 17763.      |
| Fe/Ni <sub>2.4</sub> /Co <sub>0.4</sub> -MIL-53 | 1.0 M KOH   | 219                                           | GCE/Nafion       | 53.5                 | 0.51                               | -                                    | S3. <i>Angew. Chem. Int. Ed.</i> , 2018, <b>130</b> , 1888. |
| Fe/Ni <sub>2.4</sub> /Co <sub>0.4</sub> -MIL-53 |             | 238 @100mA/cm <sup>2</sup>                    | NF/none          | 71.3                 | -                                  | -                                    |                                                             |
| Bulk NiCo-MOFs                                  | 1.0 M KOH   | 317                                           | GCE/Nafion       | 61                   | 0.2                                | 0.15 (300mV)                         | S4. <i>Nat. Energy</i> , 2016, <b>1</b> , 16184.            |
| NiCo-UMOFNs                                     |             | 250                                           | GCE/Nafion       | 42                   | 0.2                                | 0.86 (300mV)                         |                                                             |
| FeTPyP-Co                                       | 0.1 M NaOH  | 351@1 mA/cm <sup>2</sup>                      | Au/null          | -                    | -                                  | 12.2 (310mV)                         | S5. <i>J. Am. Chem. Soc.</i> , 2016, <b>138</b> , 3623.     |

|                                                                                     |           |                           |                     |       |       |                                              |                                                             |
|-------------------------------------------------------------------------------------|-----------|---------------------------|---------------------|-------|-------|----------------------------------------------|-------------------------------------------------------------|
| CoFe-MOFs-1.7                                                                       | 1.0 M KOH | 319                       | RDE/Nafion          | 56    | 0.424 | $0.42/0.66 \times 10^{-2}$ for Co/Fe (280mV) | S6. <i>ACS Appl. Mater. Inter.</i> , 2017, <b>9</b> , 362.  |
| Fe <sub>3</sub> -Co <sub>2</sub>                                                    | 0.1 M KOH | 225                       | NF/Nafion           | 48    | 0.22  | 0.61-1.82 (300mV)                            | S7. <i>J. Am. Chem. Soc.</i> , 2017, <b>139</b> , 1778.     |
|                                                                                     |           | 237                       | CF/Nafion           | 79    | 0.22  | 0.24-0.71 (300mV)                            |                                                             |
|                                                                                     |           | 283                       | GCE/Nafion          | 43    | 0.22  | 0.27 (300mV)                                 |                                                             |
| Co:Fe <sub>3</sub>                                                                  |           | 453                       | GCE/Nafion          | 63    | 0.22  | $0.031-0.088 \times 10^{-2}$ (300mV)         |                                                             |
| NNU-21(Fe <sub>3</sub> -BPTC)                                                       | 0.1 M KOH | 555                       | Carbon cloth/Nafion | 122.7 | 1.0   | $0.1 \times 10^{-2}$ (400mV)                 | S8. <i>Angew. Chem. Int. Ed.</i> , 2018, <b>57</b> , 9660.  |
| NNU-22(Fe <sub>2</sub> Co-BPTC)                                                     |           | 376                       |                     | 77.2  |       | $1.8 \times 10^{-2}$ (400mV)                 |                                                             |
| NNU-23(Fe <sub>2</sub> Ni-BPTC)                                                     |           | 365                       |                     | 81.8  |       | $2.0 \times 10^{-2}$ (400mV)                 |                                                             |
| NNU-24(Fe <sub>2</sub> Zn-BPTC)                                                     |           | 522                       |                     | 121.8 |       | $0.2 \times 10^{-2}$ (400mV)                 |                                                             |
| Co-ZIF-9                                                                            | pH =13.4  | 510@1 mA/cm <sup>2</sup>  | FTO glass/Nafion    | 93    | 0.2   | $0.058 \times 10^{-2}$ (300mV)               | S9. <i>Nanoscale.</i> , 2014, <b>6</b> , 9930.              |
| Co(C <sub>12</sub> H <sub>6</sub> O <sub>4</sub> )(H <sub>2</sub> O) <sub>4</sub> ] | 0.1 M KOH | 520                       | Cu Foil/none        | 142   | ~0.2  | $0.013 \times 10^{-2}$ (300mV)               | S10. <i>J. Am. Chem. Soc.</i> , 2014, <b>136</b> , 13925.   |
| Co-WOC-1                                                                            | 0.1 M KOH | 390@1 mA/cm <sup>2</sup>  | GCE/Nafion          | 128   | 0.283 | $1.1 \times 10^{-2}$ (400mV)                 | S11. <i>Angew. Chem. Int. Ed.</i> , 2016, <b>55</b> , 2425. |
| Co-MOF                                                                              | 1.0 M KOH | 311@50 mA/cm <sup>2</sup> | NF/none             | 77    | 5.84  | 0.18 (400mV)                                 | S12. <i>Inorg. Chem. Front.</i> , 2018, <b>5</b> , 344.     |

|                                                                                                   |               |           |                           |                          |     |       |                                                           |                                                                  |
|---------------------------------------------------------------------------------------------------|---------------|-----------|---------------------------|--------------------------|-----|-------|-----------------------------------------------------------|------------------------------------------------------------------|
| Co-MOF Powder                                                                                     |               |           | 362@50 mA/cm <sup>2</sup> | NF/none                  | 89  |       | -                                                         |                                                                  |
| Co-TBSC                                                                                           |               | 1.0 M KOH | 290                       | NF/Nafion                | 75  | -     | -                                                         | S13. <i>J. Mater. Chem. A.</i> , 2017, <b>5</b> , 23559.         |
| MAF-X27-OH                                                                                        |               | 1.0 M KOH | 387                       | GCE/Nafion               | 60  | 0.18  | $0.14 \times 10^{-2} / 3.8 \times 10^{-2}$<br>(300/400mV) | S14. <i>J. Am. Chem. Soc.</i> , 2016, <b>138</b> , 8336.         |
|                                                                                                   |               |           | 338                       | Cu Foil/none             | 82  | 0.23  | $0.74 \times 10^{-2} / 9.6 \times 10^{-2}$<br>(300/400mV) |                                                                  |
| Co-UTSA-16                                                                                        |               | 1.0 M KOH | 370                       | GCE/Nafion               | 77  | ~0.35 | -                                                         | S15. <i>ACS Appl. Mater. Interfaces.</i> , 2017, <b>9</b> , 7193 |
| Catalyst                                                                                          | MOF precursor | 1.0 M KOH | 240                       | NF@NC                    | 45  | 1.03  | $0.53 \times 10^{-2}$ (300mV)                             | S16. <i>Adv. Mater.</i> , 2017, <b>29</b> , 1604437.             |
| CoFe <sub>2</sub> O <sub>4</sub> /C NRAs                                                          | MOF-74-Co/Fe  |           |                           |                          |     |       |                                                           |                                                                  |
| CoFe <sub>2</sub> O <sub>4</sub> /C powders                                                       |               |           |                           |                          |     |       |                                                           |                                                                  |
| NiCoP/C                                                                                           | ZIF-67@LDH    | 1.0 M KOH | 330                       | GCE                      | 96  | -     | -                                                         | S17. <i>Angew. Chem. Int. Ed.</i> , 2017, <b>56</b> , 3897       |
| NiCoP                                                                                             |               |           | 370                       | GCE                      | 115 |       |                                                           |                                                                  |
| Ni-Co LDH nanoboxes                                                                               |               |           | 420                       | GCE                      | 135 |       |                                                           |                                                                  |
| Co <sub>3</sub> S <sub>4</sub> @MoS <sub>2</sub>                                                  | ZIF-67        | 1.0 M KOH | 330                       | GCE                      | 88  | 0.283 | -                                                         | S18. <i>Chem. Mater.</i> , 2017, <b>29</b> , 5566.               |
| Ni@CoO@CoNC                                                                                       | Ni@CoO@ZIF-67 | 1.0 M KOH | 309                       | NF                       | 53  | 4.0   | -                                                         | S19. <i>Chem.</i> , 2017, <b>2</b> , 791.                        |
| NiCo <sub>2</sub> O <sub>4</sub>   Ni <sub>0.33</sub> Co <sub>0.67</sub> S <sub>2</sub> nanowires |               | 1.0 M KOH | 420@5 mA/cm <sup>2</sup>  | Ti foil/none             | 60  | 0.3   | -                                                         | S20. <i>Adv. Energy Mater.</i> , 2015, <b>5</b> , 1412031.       |
| CoMn LDH                                                                                          |               | 1.0 M KOH | 324                       | GCE/Nafion               | 43  | 0.142 | $7.5 \times 10^{-2}$<br>(300mV)                           | S21. <i>J. Am. Chem. Soc.</i> , 2014, <b>136</b> , 16481.        |
| ZnCo <sub>2</sub> O <sub>4</sub>                                                                  |               | 1.0 M KOH | 390                       | Pt-Ti alloy coated glass | 46  | -     | -                                                         | S22. <i>J. Phys. Chem. Lett.</i> , 2014, <b>5</b> , 2370.        |
| CoCo LDH                                                                                          |               | 1.0 M KOH | 393                       | GCE/Nafion               | 59  | 0.07  | -                                                         | S23. <i>Nat. Commun.</i> , 2014, <b>5</b> , 4477.                |

|                                                                 |            |      |                  |       |       |                               |                                                                             |
|-----------------------------------------------------------------|------------|------|------------------|-------|-------|-------------------------------|-----------------------------------------------------------------------------|
| NiCo LDH                                                        | 1.0 M KOH  | 367  | Carbon paper     | 40    | 0.17  | -                             | S24. <i>Nano let.</i> , 2015, <b>15</b> , 1421.                             |
| CoNi nanosheets                                                 | 1.0 M KOH  | 450  | GCE/Nafion       | 56.8  | -     | -                             | S25. <i>Chem. Sci.</i> , 2015, <b>6</b> , 3572.                             |
| CoFe nanosheets                                                 |            | 380  |                  | 44.9  |       |                               |                                                                             |
| CoNi/C                                                          |            | 360  |                  | 38.5  |       |                               |                                                                             |
| CoFe/C                                                          |            | 300  |                  | 61    |       |                               |                                                                             |
| Ni <sub>x</sub> Co <sub>3-x</sub> O <sub>4</sub> nanowire array | 1.0 M KOH  | ~370 | Ti foil          | 120   | ~3.0  | -                             | S26. <i>Adv. Mater.</i> , 2010, <b>22</b> , 1926.                           |
| Ni-Co-mixedoxide nanocages                                      | 1.0M KOH   | 380  | GCE/Nafion       | 50    | -     | -                             | S27. <i>Adv. Mater.</i> , 2016, <b>28</b> , 4601.                           |
| Ni-substituted Co <sub>3</sub> O <sub>4</sub> Nanowire array    | 1.0 M NaOH | ~370 | NF               | 65-75 | -     | -                             | S28. <i>Int. J. Hydrogen Energy</i> , 2011, <b>36</b> ,72.                  |
| Co <sub>0.5</sub> Fe <sub>0.5</sub> S@N-MC                      | 1.0 M KOH  | 410  | GCE/Nafion       | 159   | 0.8   | -                             | S29. <i>ACS Applied Materials &amp; Interfaces</i> , 2015, <b>7</b> , 1207. |
| Mn <sub>3</sub> O <sub>4</sub> /CoSe <sub>2</sub>               | 0.1 M KOH  | 450  | GCE/Nafion       | 49    | 0.2   | -                             | S30. <i>J. Am. Chem. Soc.</i> , 2012, <b>134</b> , 2930                     |
| NiCo <sub>2.7</sub> (OH) <sub>x</sub>                           | 1.0 M KOH  | 350  | GCE/Nafion       | 65    | -     | 0.18 (350mV)                  | S31. <i>Adv. Energy Mater.</i> , 2015, <b>5</b> , 1401880.                  |
| CoMnP                                                           | 1.0 M KOH  | 330  | GCE/Nafion       | 61    | 0.284 | -                             | S32. <i>J. Am. Chem. Soc.</i> , 2016, <b>138</b> , 4006.                    |
| Fe-mCo <sub>3</sub> O <sub>4</sub>                              | 1.0 M KOH  | 380  | GCE/Nafion       | 60    | -     | 2.6×10 <sup>-2</sup> (400mV)  | S33. <i>Chem. Commun.</i> , 2014, <b>50</b> , 10122.                        |
| NiCo <sub>2</sub> O <sub>4</sub> nanowires                      | 1.0 M KOH  | 460  | FTO              | 90    | 1.0   | 1.23×10 <sup>-2</sup> (600mV) | S34. <i>J. Mater. Chem. A</i> , 2014, <b>2</b> , 20823.                     |
| NiCo <sub>2</sub> O <sub>4</sub> nanoneedles                    | 1.0 M KOH  | 565  | FTO              | 292   | 0.53  | -                             | S35. <i>J. Phys. Chem. C</i> , 2014, <b>118</b> , 25939.                    |
| Ni-Co oxide (10 at% Co)                                         | 1.0 M NaOH | 325  | nanoporous layer | 39    | -     | -                             | S36. <i>ACS nano</i> , 2014, <b>8</b> , 9518.                               |
| Hollow Ni-Co oxide nanosponges                                  | 0.1 M KOH  | 362  | GCE/Nafion       | 64.4  | 0.2   | -                             | S37. <i>Chem. Commun.</i> , 2015, <b>51</b> , 7851.                         |



|                                                                                         |           |     |              |     |        |                                   |                                                                   |
|-----------------------------------------------------------------------------------------|-----------|-----|--------------|-----|--------|-----------------------------------|-------------------------------------------------------------------|
| NiCo <sub>2</sub> O <sub>4</sub>                                                        | 0.1 M KOH | 390 | GCE/Nafion   | 87  | -      | -                                 | S38. <i>Nanoscale</i> , 2014, <b>6</b> , 3173.                    |
| Co <sub>3</sub> O <sub>4</sub> @CoO SC                                                  | PH=13.6   | 430 | GCE/Nafion   | 89  | 0.025  | 4.87×10 <sup>-2</sup><br>(400mV)  | S39. <i>Nat. Commun.</i> , 2015, <b>6</b> , 8106.                 |
| IrO <sub>2</sub>                                                                        |           | 411 | GCE/Nafion   | 91  |        | 21.52×10 <sup>-2</sup><br>(400mV) |                                                                   |
| RuO <sub>2</sub>                                                                        |           | 358 | GCE/Nafion   | 55  |        | 53.09×10 <sup>-2</sup><br>(400mV) |                                                                   |
| Co <sub>3</sub> O <sub>4</sub> -CuCo <sub>2</sub> O <sub>4</sub>                        | 0.1M KOH  | 498 | GCE/Nafion   | -   | ~0.12  | -                                 | S40. <i>Chem. Mater.</i> , 2013, <b>25</b> , 4926.                |
| NiCo LDH                                                                                | 1.0 M KOH | 367 | Carbonpaper  | 40  | ~0.17  | -                                 | S41. <i>Nano Lett.</i> , 2015, <b>15</b> , 1421.                  |
| porous N-doped<br>grapheneNiCo <sub>2</sub> O <sub>4</sub>                              | 0.1 M KOH | 434 | hybrid films | 156 | -      | -                                 | S42. <i>Acs Nano.</i> , 2013, <b>7</b> , 10190.                   |
| NiCo <sub>2</sub> S <sub>4</sub> @N/S-doped graphene                                    | 0.1 M KOH | 470 | GCE/Nafion   | -   | ~0.283 | -                                 | S43. <i>ACS Appl. Mater. Interfaces</i> , 2013, <b>5</b> , 5002.  |
| Co/Mo <sub>2</sub> C/Co <sub>6</sub> Mo <sub>6</sub> C <sub>2</sub> /NCRGO              | 1.0 M KOH | 430 | GCE/Nafion   | 45  | ~0.14  | -                                 | S44. <i>ACS Appl. Mater. Interfaces</i> , 2017, <b>9</b> , 16977. |
| Co <sub>6</sub> Mo <sub>6</sub> C <sub>2</sub> /NCRGO                                   |           | 260 | GCE/Nafion   | 50  |        |                                   |                                                                   |
| Co <sub>6</sub> Mo <sub>6</sub> C <sub>2</sub> /Co <sub>6</sub> Mo <sub>6</sub> C/NCRGO |           | 400 | GCE/Nafion   | 58  |        |                                   |                                                                   |
| Co-Mo-C/NRGO-1                                                                          | 1.0 M KOH | 330 | GCE/Nafion   | 42  | ~0.14  | -                                 | S45. <i>J. Mater. Chem. A</i> , 2016, <b>4</b> , 18100.           |
| IrO <sub>2</sub>                                                                        |           | 387 | GCE/Nafion   | 77  |        |                                   |                                                                   |
| Mo <sub>2</sub> C/Co <sub>6</sub> Mo <sub>6</sub> C <sub>2</sub> /NRGO                  |           | 360 | GCE/Nafion   | 50  |        |                                   |                                                                   |
| P-Mn <sub>x</sub> Co <sub>3-x</sub> O <sub>4-δ</sub>                                    | 0.1 M KOH | 350 | RRDE/Nafion  | 85  | -      | 0.25                              | S46. <i>Chem.-Eur.J.</i> , 2014, <b>20</b> , 12669.               |
| Co-Mo-S                                                                                 | 1.0 M KOH | 300 | Carbon cloth | 78  | 1      | -                                 | S47. <i>Nanoscale</i> , 2018, <b>10</b> , 8404.                   |

Note: NF: nickel foam; CF: copper foam; GCE: glassy carbon electrode, for GCE, the catalysts were coated with Nafion binder; RDE: rotating disk electrode; FTO: fluorine-doped tin oxide; LDH: Layered double hydroxides; H<sub>2</sub>TPyP: 5,10,15,20-tetra(4-pyridyl)-21*H*,23*H*-porphyrine; TBSC: *p-tert*-butylsulfonylcalix[4]arene;

NF@NC: Nitrogen doped carbon coated on nickel foam; Co-WOC-1: H<sub>3</sub>BTB = 1,3,5-benzenetribenzoic acid; dpe =1,2-di(4-pyridyl)ethylene; RRDE = Rotating ring-disk electrode.

Turnover frequency (TOF) of the catalysts: Based on the LSV,  $TOF = (j \times A) / (4 \times F \times m)$ , where  $j$  is the current density (mA/cm<sup>2</sup>) at a given overpotential,  $A$  is the surface area of the nickel foam (NF, 1 cm<sup>2</sup>),  $F$  is the faraday constant (96485 C/mol),  $m$  is the moles of active sites on the electrode, respectively. All the catalytically related metal atoms were assumed to be accessible for catalysis the OER.

### Supporting Information References:

- S1 Y. Zhao, R. Nakamura, K. Kamiya, S. Nakanishi and K. Hashimoto, *Nat. Commun.*, 2013, **4**, 2390-2396.
- S2 T. T. Gao, Z. Y. Jin, M. Liao, J. L. Xiao, H. Y. Yuan and D. Xiao, *J. Mater. Chem. A.*, 2015, **3**, 17763-17770.
- S3 F. L. Li, Q. Shao, X. Q. Huang and J. P. Lang, *Angew. Chem. Int. Ed.*, 2018, **130**, 1888-1892.
- S4 S. L. Zhao, Y. Wang, J. C. Dong, C. T. He, H. J. Yin, P. F. An, K. Zhao, X. F. Zhang, C. Gao, L. J. Zhang, J. W. Lv, J. X. Wang, J. Q. Zhang, A. M. Khattak, N. A. Khan, Z. X. Wei, J. Zhang, S. Q. Liu, H. J. Zhao and Z. Y. Tang, *Nat. Energy*. 2016, **1**, 16184-16193.
- S5 B. Wurster, D. Grumelli, D. Hötger, R. Gutzler and K. Kern, *J. Am. Chem. Soc.*, 2016, **138**, 3623-3626.
- S6 T. Zhang, J. Du, P. X. Xi and C. L. Xu, *ACS Appl. Mater. Interfaces.*, 2016, **9**, 362-370.
- S7 J. Q. Shen, P. Q. Liao, D. D. Zhou, C. T. He, J. X. Wu, W. X. Zhang, J. P. Zhang and X. M. Chen, *J. Am. Chem. Soc.*, 2017, **139**, 1778-1781.
- S8 X. L. Wang, L. Z. Dong, M. Qiao, Y. J. Tang, J. Liu, Y. F. Li, S. L. Li, J. X. Su and Y. Q. Lan, *Angew. Chem. Int. Ed.*, 2018, **57**, 9660-9664.
- S9 S. B. Wang, Y. D. Hou, S. Lin and X. C. Wang, *Nanoscale*, 2014, **6**, 9930-9934.
- S10 T. Y. Ma, S. Dai, M. Jaroniec and S. Z. Qiao, *J. Am. Chem. Soc.*, 2014, **136**, 13925-13931.
- S11 P. Manna, J. Debgupta, S. Bose and S. K. Das, *Angew. Chem. Int. Ed.*, 2016, **55**, 2425-2430.
- S12 X. P. Zhang, W. D. Sun, H. T. Du, R. M. Kong and F. L. Qu, *Inorg. Chem. Front.*, 2018, **5**, 344-347.
- S13 N. Bhuvaneshwari, K. P. Annamalai, F. R. Dai and Z. N. Chen, *J. Mater. Chem. A.*, 2017, **5**, 23559-23565.

- S14 X. F. Lu, P. Q. Liao, J. W. Wang, J. X. Wu, X. W. Chen, C. T. He, J. P. Zhang, G. R. Li and X. M. Chen, *J. Am. Chem. Soc.*, 2016, **138**, 8336-8339.
- S15 J. Jiang, L. Huang, X. M. Liu and L. H. Ai, *ACS Appl. Mater. Interfaces.*, 2017, **9**, 7193–7201.
- S16 X. F. Lu, L. F. Gu, J. W. Wang, J. X. Wu, P. Q. Liao and G. R. Li, *Adv. Mater.*, 2017, **29**, 1604437-1604443.
- S17 P. L. He, X. Y. Yu and X. W. (D.) Lou, *Angew. Chem. Int. Ed.*, 2017, **56**, 3897-3900.
- S18 Y. N. Guo, J. Tang, H. Y. Qian, Z. L. Wang and Y. Yanmauchi. *Chem. Mater.*, 2017, **29**, 5566-5573.
- S19 G. R. Cai, W. Zhang, L. Jiao, S. H. Yu and H. L. Jiang, *Chem.*, 2017, **2**, 791-802.
- S20 Z. Peng, D. S. Jia, A. M. Al-Enizi, A. A. Elzatahry and G. F. Zheng, *Adv. Energy Mater.*, 2015, **5**, 1402031-1402037.
- S21 F. Song and X. Hu, *J. Am. Chem. Soc.*, 2014, **136**, 16481-16484.
- S22 T. W. Kim, M. A. Woo, M. Regis and K. S. Choi, *J. Phys. Chem. Lett.*, 2014, **5**, 2370-2374.
- S23 F. Song and X. Hu, *Nat. Commun.*, 2014, **5**, 4477-4485.
- S24 H. F., Liang, F. Meng, M. Cabán-Acevedo, L. S. Li, A. Forticaux, L. C. Xiu, Z. C. Wang and S. Jin, *Nano let.*, 2015, **15**, 1421-1427.
- S25 B. Ni and X. Wang, *Chem. Sci.*, 2015, **6**, 3572-3576.
- S26 B. Y. G. Li, P. Hasin and Y. Y. Wu, *Adv. Mater.*, 2010, **22**, 1926-1929.
- S27 L. Han, X. Y. Yu and X. W. (D.) Lou, *Adv. Mater.*, 2016, **28**, 4601-4605.
- S28 B. G. Lu, D. X. Cao, P. Wang, G. L. Wang and Y. Y. Gao, *Int. J. Hydrogen Energy.*, 2011, **36**, 72-78.
- S29 M. X. Shen, C. P. Ruan, Y. Chen, C. H. Jiang, K. L. Ai and L. H. Lu, *ACS Appl. Mater. Interfaces*, 2015, **7**, 1207-1218.
- S30 M. R. Gao, Y. F. Xu, J. Jiang, Zheng Y. R. and S. H. Yu, *J. Am. Chem. Soc.*, 2012, **134**, 2930-2933.
- S31 J. W. Nai, H. J. Yin, T. T. You, L. R. Zheng, J. Zhang, P. X. Wang, Z. Jin, Y. Tian, J. Z. Liu, Z. Y. Tang and L. Guo, *Adv. Energy Mater.*, 2015, **5**, 1401880-1401886.
- S32 D. Li, H. Baydoun, C. N. Verani and S. L. Brock, *J. Am. Chem. Soc.*, 2016, **138**, 4006-4009.

- S33 C. L. Xiao, X. Y. Lu and C. Zhao, *Chem. Commun.*, 2014, **50**, 10122-10125.
- S34 X. X. Yu, Z. J. Sun, Z. P. Yan, B. Xiang, X. Liu and P. W. Du, *J. Mater. Chem. A.*, 2014, **2**, 20823-20831.
- S35 H. J. Shi and G. H. Zhao, *J. Phys. Chem. C.*, 2014, **118**, 25939-25946.
- S36 Y. Yang, H. L. Fei, G. D. Ruan, C. S. Xiang and J. M. Tour, *ACS nano.*, 2014, **8**, 9518-9523.
- S37 C. Z. Zhu, D. Wen, S. Leubner, M. Oschatz, W. Liu, M. Holzschuh, F. Simon, S. Kaskel and A. Eychmüller, *Chem. Commun.*, 2015, **51**, 7851-7854.
- S38 M. Prabu, K. Ketpang and S. Shanmugam, *Nanoscale.*, 2014, **6**, 3173-3181.
- S39 C. W. Tung, Y. Y. Hsu, Y. P. Shen, Y. X. Zheng, T. S. Chan, H. S. Shen, Y. C. Cheng and H. M. Chen, *Nat. Commun.*, 2015, **6**, 8106-8115.
- S40 T. Grewe, X. H. Deng, C. Weidenthaler, F. Schüth and H. Tüysüz, *Chem. Mater.*, 2013, **25**, 4926-4935.
- S41 H. F. Liang, F. Meng, M. Cabán-Acevedo, L. S. Li, A. Forticaux, L. C. Xiu, Z. C. Wang and S. Jin, *Nano Lett.*, 2015, **15**, 1421-1427.
- S42 S. Chen and S. Z. Qiao, *Acs Nano.*, 2013, **7**, 10190-10196.
- S43 Q. Liu, J. T. Jin and J. Y. Zhang, *ACS Appl. Mater. Interfaces.*, 2013, **5**, 5002-5008.
- S44 Y. J. Tang, C. H. Liu, W. Huang, X. L. Wang, L. Z. Dong, S. L. Li and Y. Q. Lan, *ACS Appl. Mater. Interfaces.*, 2017, **9**, 16977-16985.
- S45 C. H. Liu, Y. J. Tang, X. L. Wang, W. Huang, S. L. Li, L. Z. Dong and Y. Q. Lan, *J. Mater. Chem. A.*, 2016, **4**, 18100-18106.
- S46 T. Y. Ma, S. Dai, M. Jaroniec and S. Z. Qiao, *Chem.-Eur. J.*, 2014, **20**, 12669-12676.
- S47 Y. J. Tang, A. M. Zhang, H. J. Zhu, L. Z. Dong, X. L. Wang, S. L. Li, M. Han, X. X. Xu and Y. Q. Lan, *Nanoscale.*, 2018, **10**, 8404-8412.
